# Genetics of transient amnesia highlights a vascular role in memory

Manuel A. Rivas<sup>1</sup>, FinnGen, Mark J. Daly<sup>2,3,4</sup>

E-mail: [mrivas@stanford.edu](mailto:mrivas@stanford.edu) and [mjdaly@broadinstitute.org](mailto:mjdaly@broadinstitute.org)

1 Department of Biomedical Data Science, Stanford University, CA, USA

2 Institute for Molecular Medicine Finland (FIMM), University of Helsinki, Helsinki, Finland

3 Analytic and Translational Genetics Unit, Massachusetts General Hospital, Boston, MA, USA

4 Broad Institute of MIT and Harvard, Cambridge, MA, USA

## Abstract

Where memory is stored and how it is processed is poorly understood. Traditionally, genetics of low prevalence traits have been used to get a better understanding of naturally occurring conditions across species. Here, we conduct a genome-wide association of transient global amnesia (TGA), a specific type of heritable amnesia characterized by a sudden, temporary episode of memory loss, across 4,303 patients and over 1 million controls from three population biobanks in Finland, United States, and the United Kingdom, to better understand the genetic basis of memory. We find nine loci associated with TGA ( $p < 5 \times 10^{-8}$ ) including a missense variant in *CRIP1* with high posterior probability ( $> .9$ ) of being the causally relevant variant using fine-mapping, replicated across 3 cohorts. Furthermore, we find enrichment for a specific cell type, pericyte cells, which are a key part of the neurovascular unit, which includes astrocytes and neurons, and control interactions between neurons and the cerebral vasculature, implicating a direct vascular role in memory formation and retrieval. We anticipate these genetic studies at a larger scale to bring new biological understanding and therapeutic insights into the brain and memory.

## Introduction

Amnesia is a condition that affects memory, involving a loss of memory that may be partial or complete, temporary or permanent. It's directly related to memory because it specifically impacts the ability to recall information that was previously known or the ability to form new memories. Amnesia primarily impacts explicit (declarative) memory, which involves conscious recall of facts and events. Implicit (nondeclarative) memory, such as skills like riding a bike or swimming, typically remains unaffected because it is thought to be stored in different brain areas<sup>1</sup>. There are several types of amnesia, and they can be caused by various factors including brain injury, disease affecting the brain, certain medications, or psychological trauma.

The effects on memory can range from difficulty forming new memories (anterograde amnesia) to trouble recalling past experiences (retrograde amnesia).

Transient global amnesia (TGA) is a specific type of amnesia characterized by a sudden, temporary episode of memory loss, during which the individual cannot form new memories and may have difficulty recalling past events. These episodes are usually brief, typically lasting for several hours, after which the person's memory gradually returns, and there is no lasting damage to memory<sup>2</sup>. The cause of TGA is not entirely understood, but it's thought to be related to temporary disruption of blood flow to certain parts of the brain that are involved in memory formation and retrieval. Recent MRI data suggest that a transient perturbation of hippocampal function is the functional correlate of TGA because focal diffusion lesions can be detected in the CA1 field of the hippocampal cornu ammonis<sup>3</sup>. Nonetheless, these data are inconclusive. Notably, a diagnosis of TGA is not given when the amnesia may be related to stroke, epilepsy/seizure or neurodegenerative disease<sup>4</sup>.

Age and migraine are established risk factors to trigger TGA<sup>3</sup>. Historically, genetics has been a powerful approach to gain insights into the causal biology of poorly understood conditions<sup>5</sup>. Here, we use genetic analysis of transient global amnesia from global population biobanks to better understand memory. First, FinnGen has directly genotyped and aggregated phenotype outcomes in over 470,000 individuals from Finland, an isolated population with recent bottlenecks that offers an opportunity for studying genetic variants in complex phenotypes<sup>6</sup>. Second, UK Biobank has genotyped and aggregated medical records and phenotypes from over 500,000 individuals<sup>7,8</sup> living in the UK. Third, AllofUS has sequenced and aggregated phenotype outcomes in over 240,000 individuals from the United States<sup>9</sup>.

## Results

### Exploration of phenotypes in Finland correlated with transient global amnesia in time

Public summary data from FinRegistry, a research project that utilizes the registry system in Finland to combine health data with a wide range of information from nearly the whole population of Finland, indicates that transient global amnesia is associated with transient ischemic attack ( $J_i = 1.62$ ). In FinnGen we find consistent signals where transient cerebral ischemic attack is associated with a 3.3-fold increased risk of transient global amnesia ( $-\log_{10}(P) = 80.8$ ). Nonetheless, only 453 out of the 3020 matched cases that exhibit transient global amnesia have had an episode of transient cerebral ischemic attack.

## Genome-wide meta-analysis identifies 9 loci associated with transient global amnesia

We undertook a meta-analysis of three transient global amnesia genome-wide association studies (GWAS) from FinnGen (number of cases = 3315, number of controls = 471,699), UK Biobank (number of cases = 692, number of controls = 413,669), and AllofUS (number of cases = 296 cases, number of controls = 124,781). We identified 9 new susceptibility loci meeting genome-wide significance as there has been no prior GWAS study conducted of TGA (see **Figure 1A**, see **Table 1**,  $P < 5 \times 10^{-8}$ ).

A quantile-quantile plot of the primary meta-statistic using single-SNP z-scores combined across all sample sets showed a marked excess of significant associations (see **Figure 1B**).

## Genetic correlation of transient global amnesia

Genetic correlation estimates are measures that describe the degree of shared genetic influences between two traits or disorders. These estimates can provide insights into whether and how strongly genetic factors contribute to the covariance between traits. Several factors can influence these estimates including pleiotropy, evolutionary history including genetic drift and selective pressures, and ascertainment bias (for example certain individuals may be excluded from the definition of a case thereby giving the appearance that the genetics of a trait has the opposite effect on the trait that was excluded). Here, we estimate the correlation of genetic effects between transient global amnesia and FinnGen phenotypes using LD score regression<sup>10</sup>. LD score regression uses genome-wide data to estimate the correlation of genetic effect parameters thereby not restricting to genome-wide significant findings. We find the genetics of nontraumatic intracranial haemorrhage and migraine to be positively correlated with the genetics of transient global amnesia ( $r_g = 0.29$ ,  $P = .0016$ ;  $r_g = 0.16$ ,  $P = 0.0035$ , respectively, see **Figure 2**). In addition, we find the genetics of specific developmental disorders of scholastic skills to be inversely correlated with the genetics of transient global amnesia ( $r_g = -0.48$ ,  $P = .0006$ ). Specific developmental disorders of scholastic skills refers to disorders in which the normal patterns of skill acquisition are disturbed from the early stages of development. It is not simply a consequence of mental retardation, and it is not due to any form of acquired brain trauma or disease<sup>11</sup>. Similarly, the genetics of senile degeneration of the brain and myositis ossificans were inversely correlated with the genetics of TGA ( $r_g = -0.42$ ,  $P = 0.005$ ;  $r_g = -0.33$ ,  $P = .0045$ , respectively, see **Figure 2**).

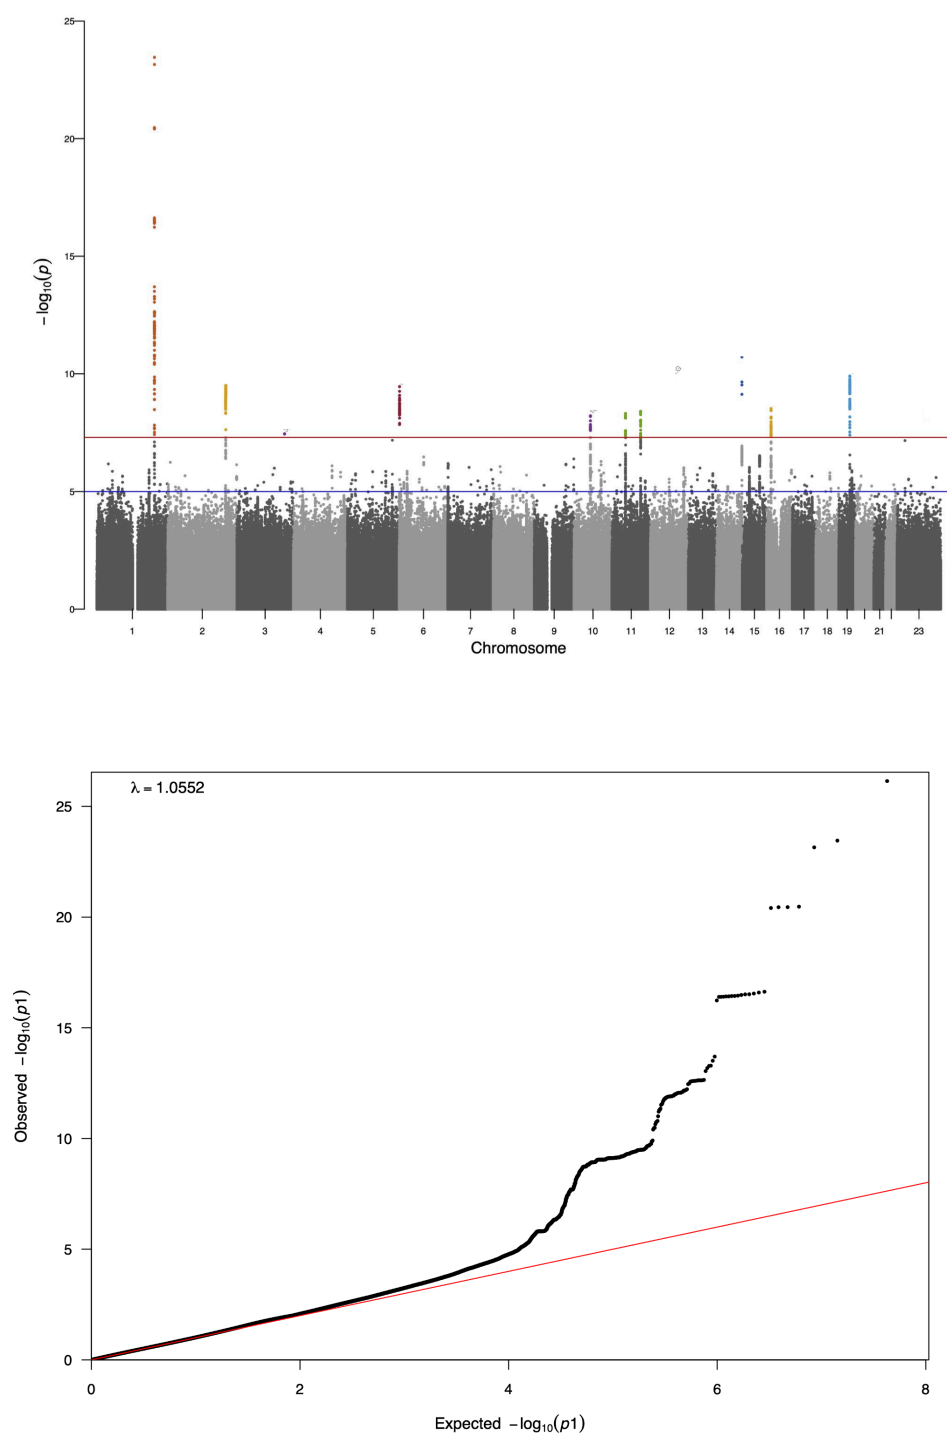

**Figure 1. a) Manhattan plot of genome-wide association meta-analysis for transient global amnesia.** Summary statistics from GWAS analysis of 3,315 transient global amnesia

cases and 471,669 controls in FinnGen were combined with summary statistics from GWAS analysis of 692 TGA cases and 413,669 controls in UK Biobank, and 296 TGA cases and 124,781 controls in AllofUS. (x-axis) genomic position of genetic variant, (y-axis)  $-\log_{10}(P\text{-value})$  of tested genetic variant. **b) Q-Q plot of p-values from genetic association meta-analysis for transient global amnesia.** (x-axis)  $-\log_{10}(\text{expected } P\text{-value})$  and (y-axis)  $-\log_{10}(\text{observed } P\text{-value})$ .

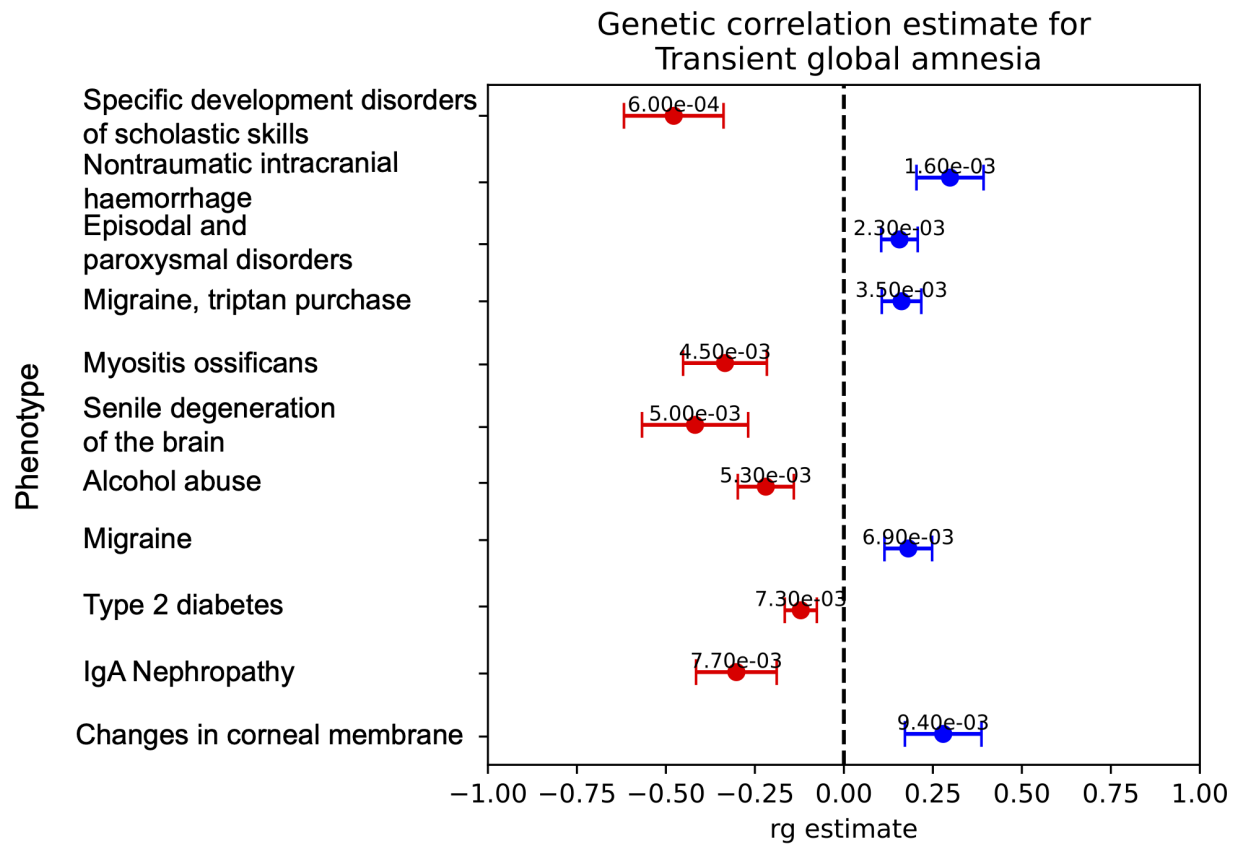

**Figure 2. Estimates of the correlation of genetic effects between TGA and other phenotypes across FinnGen and UK Biobank.** (x-axis) rg estimate between TGA and (y-axis) phenotype. rg  $\pm$  SE is shown, LD score regression  $P$  value is shown in text. Phenotypes with  $P < .01$  are shown.

## Phenome-wide association of 9 TGA lead variants

Given the overall overlap of genetic effects with other conditions we asked whether the top 8 Transient global amnesia associated variants had patterns of pleiotropic effects (assessed as  $P < 5 \times 10^{-5}$ ) or whether the effects were specific to TGA. Of the 9 loci, 5 had evidence of being associated with another condition including coronary revascularization and myocardial infarction ( $n = 2$ ), hypertension ( $n = 2$ ), and pulse rate and pulse pressure ( $n=2$ ). Although we did find that the genetic variant proximal to *FOXF2* associated with TGA also associates to stroke, the effects are in the opposite direction (see **Supplementary Table 1**). To our surprise, multiple of the genetic variants that are significantly associated with transient global amnesia are specific, i.e.  $P > 5 \times 10^{-5}$  across all conditions assessed across both UK Biobank and FinnGen. In particular, we find that the associated variant, rs72744832 (OR = 1.41), an intronic variant in *LMOD1* does not associate with other diseases, but is associated with lean mass phenotypes in UK Biobank. *LMOD1* has high observed expression in tibial, coronary, and aorta artery (median TPM > 800), however quantitative trait analysis does not reveal any specific overlap that may indicate the genetic variant is involved in regulating expression of *LMOD1*<sup>12</sup>. In addition to the cardiovascular phenotypic overlaps being the most prominent, of the 7 genes noted in table 1 as the most likely based on proximity, 4 of these (*LMOD1*, *CRIP1*, *ACTN4*, *MYH11*) have extremely strong arterial expression in GTEx, while two others (*ARHGAP42* and *IPMK*) are more broadly expressed including substantial arterial expression.

To explore more specifically these potential genes, we used the Enrichr tool<sup>13</sup> program to probe two recently published compendia of cellular profiles: CellMarker<sup>13,14</sup> and Tabula Sapiens. The top associations are shown in **Supplementary Table 2** - of note, the most significant enrichment is with Mural cell brain expression in mouse ( $p = 9.2 \times 10^{-7}$ , OR = 244) and among human cells in Tabula Sapiens, the three equally enriched cell types ( $p < .001$ ) include vascular pericyte cells (the subset of mural cells relevant to small vessels/capillaries) ( $p = 6.7 \times 10^{-4}$ , OR = 67)<sup>13</sup>.

| Variant ID       | rsids       | nearest_genes   | OR   | META_pval | Cell type expression                     |
|------------------|-------------|-----------------|------|-----------|------------------------------------------|
| 1-201926536-T-C  | rs72744832  | <i>LMOD1</i>    | 1.41 | 7.19E-27  | Pericyte cell                            |
| 14-105488368-C-T | rs55633823  | <i>CRIP1</i>    | 1.19 | 1.93E-11  | Vascular endothelial cells in cerebellum |
| 19-38694171-G-A  | rs7251903   | <i>ACTN4</i>    | 0.87 | 1.24E-10  | Vascular endothelial cells in cerebellum |
| 2-203331895-C-T  | rs116426890 | many            | 1.22 | 4.90E-10  |                                          |
| 6-1366655-G-T    | rs192238573 | <i>FOXF2</i>    | 0.79 | 5.52E-10  | Mural cell brain                         |
| 16-15814272-T-G  | rs12919510  | <i>MYH11</i>    | 1.14 | 3.00E-09  | Pericyte cell                            |
| 11-100639014-A-T | rs10894996  | <i>ARHGAP42</i> | 0.87 | 4.06E-09  |                                          |

|                 |           |             |      |          |  |
|-----------------|-----------|-------------|------|----------|--|
| 11-47637583-G-A | rs7118178 | many        | 1.16 | 4.87E-09 |  |
| 10-58170232-G-A | rs1769016 | <i>IPMK</i> | 0.86 | 1.45E-08 |  |

**Table 1. FinnGen and UK Biobank meta-analysis associated variants with index SNP.**

Genetic variants with  $P$  value  $< 5 \times 10^{-8}$  are shown. Variant ID corresponds to chromosome-position-ref-alt for hg38 build, rsids column correspond to the rsID of the index variant, nearest genes is the gene proximal to index SNP (when most associated SNPs are localized intrinsically or in a small intergenic region), beta corresponds to estimated log(odds ratio), META\_pval correspond to the meta analysis p-value when combining genetic effects estimated in FinnGen and UK Biobank, FINNGEN\_af\_alt corresponds to the allele frequency of the alternate allele in FinnGen and UKBB\_af\_alt corresponds to the allele frequency of the alternate allele in UK Biobank. For two loci, associated variants spanned long regions of LD with equivalent evidence for ~10 genes, and for one (*CRIP1*) the gene was nominated based on the lead variant being a missense variant. All variants displayed had a  $P$  value  $> .05$  for heterogeneity of genetic effects, i.e. no significant evidence of heterogeneity observed.

## Protein-altering variant, p.Ala58Val, in *CRIP1* is associated with memory loss

Given established enrichment (along with improved interpretability) of protein-altering variants associated with disease<sup>15,16</sup> we asked whether any of the significantly associated variants pinpointed protein-altering variants that associate with TGA. Here, we found that a missense variant, p.Ala58Val, in *CRIP1* associates with transient global amnesia (meta-analysis  $P = 2.1 \times 10^{-11}$ , see **Figure 3**) - top index SNP in the region. The genetic variant has consistent effects in UK Biobank (odds ratio = 1.28,  $P = 3.1 \times 10^{-5}$ ) and FinnGen (odds ratio = 1.17,  $P = 6.9 \times 10^{-8}$ ) highlighting the robustness of the association. *CRIP1* is found to be highly expressed in coronary, tibial, and aorta artery tissue<sup>12</sup>. *CRIP1* has a role in zinc absorption and functions as an intracellular zinc transport protein<sup>17,18</sup>. This variant has been previously noted as the most likely causal variant ( $0.75 < \text{PIP} < 1$ ) underlying genome wide associations to increased height and heel bone mineral density and decreased calcium levels in UK Biobank quantitative trait analyses<sup>19</sup>.

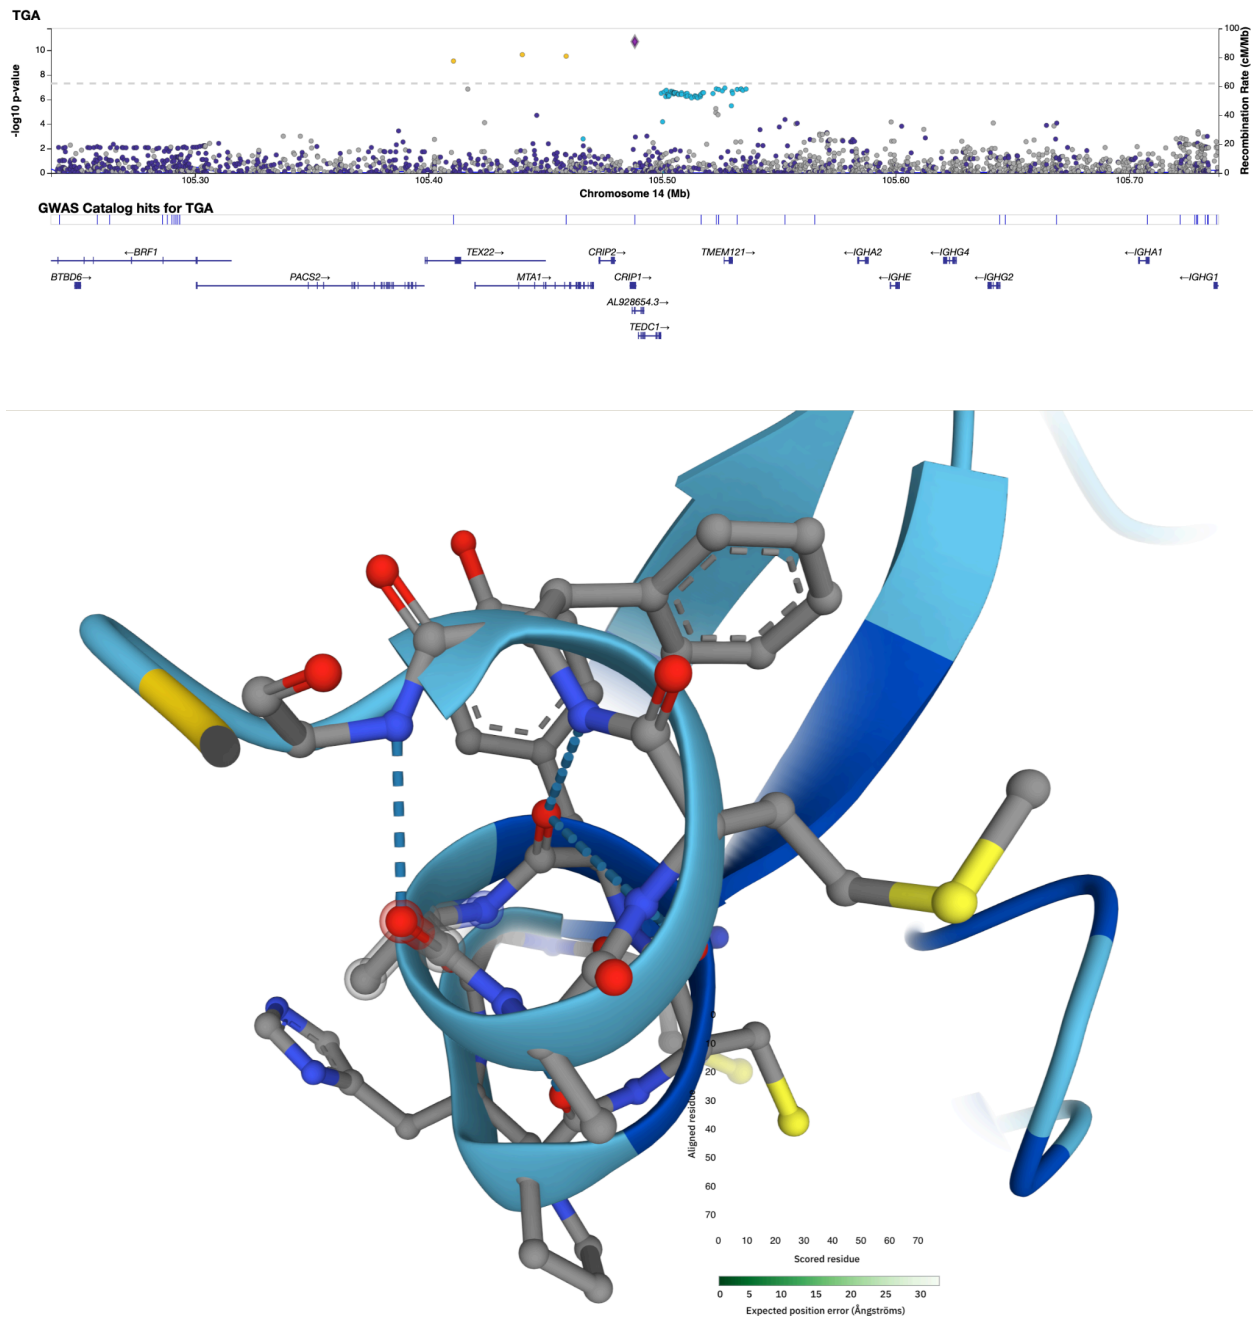

**Figure 3. *CRIP1* locus associated with transient global amnesia.** On the x-axis is the location and gene diagram of the *CRIP1* locus. The scatter plot shows the associated variants, y-axis corresponds to the  $-\log_{10}(\text{meta analysis } P \text{ value})$ . Highlighted is the missense variant, p.Ala58Val, in *CRIP1*. Location of CRIP1 p.Ala58Val mutation in protein structure UniProt P50238.



## Discussion

In this study we present the first genetic dissection of transient global amnesia, an unusual form of transient memory loss attributable to factors beyond those observed in Alzheimer's disease or secondary to stroke or seizure. Using genome wide association across three biobanks, totalling 4303 cases and more than 1 million controls, we identify nine genome wide significant associations.

Notably, the variants identified in this study overlap with previously documented associated variants to several cardiovascular phenotypes - with multiple hits to coronary revascularization, hypertension and pulse pressure among the associations with prior evidence of association. Along with a majority of implicated genes showing extremely strong expression in artery, this lends strong support to the hypothesis that TGA may have a largely vascular origin, rather than a neuronal one. The same susceptibility origin has previously been noted for migraine, one of the main established risk factors for TGA, though the associations described here are not broadly here seen in migraine.

One of the nine associations points strongly to a missense variant in CRIP1 that has previously been implicated as the likely causal variant in increased height and bone mineral density along with lower serum calcium levels. We anticipate that these results may open new opportunities towards understanding, in particular, the vascular components of memory and memory loss, providing genes and variants for deeper molecular and phenotypic exploration.

## References

1. Russell, W. R. *The Traumatic Amnesias*. (Oxford University Press, USA, 1971).
2. Ropper, A. H. Transient Global Amnesia. *N. Engl. J. Med.* **388**, 635–640 (2023).
3. Bartsch, T. & Deuschl, G. Transient global amnesia: functional anatomy and clinical implications. *Lancet Neurol.* **9**, 205–214 (2010).
4. Nehring, S. M., Spurling, B. C. & Kumar, A. Transient Global Amnesia. in *StatPearls [Internet]* (StatPearls Publishing, 2024).
5. Rommens, J. M. *et al.* Identification of the cystic fibrosis gene: chromosome walking and jumping. *Science* **245**, 1059–1065 (1989).
6. Kurki, M. I. *et al.* FinnGen provides genetic insights from a well-phenotyped isolated population. *Nature* **613**, 508–518 (2023).

7. Allen, N. E. *et al.* Prospective study design and data analysis in UK Biobank. *Sci. Transl. Med.* **16**, eadf4428 (2024).
8. Bycroft, C. *et al.* The UK Biobank resource with deep phenotyping and genomic data. *Nature* **562**, 203–209 (2018).
9. Genomic data in the All of Us Research Program. *Nature* **627**, 340–346 (2024).
10. Bulik-Sullivan, B. *et al.* An atlas of genetic correlations across human diseases and traits. *Nat. Genet.* **47**, 1236–1241 (2015).
11. Weindrich, D., Jennen-Steinmetz, C., Laucht, M., Esser, G. & Schmidt, M. H. Epidemiology and prognosis of specific disorders of language and scholastic skills. *Eur. Child Adolesc. Psychiatry* **9**, 186–194 (2000).
12. GTEx Consortium. Human genomics. The Genotype-Tissue Expression (GTEx) pilot analysis: multitissue gene regulation in humans. *Science* **348**, 648–660 (2015).
13. Chen, E. Y. *et al.* Enrichr: interactive and collaborative HTML5 gene list enrichment analysis tool. *BMC Bioinformatics* **14**, 128 (2013).
14. Hu, C. *et al.* CellMarker 2.0: an updated database of manually curated cell markers in human/mouse and web tools based on scRNA-seq data. *Nucleic Acids Res.* **51**, D870–D876 (2023).
15. Tanigawa, Y. *et al.* Rare protein-altering variants in ANGPTL7 lower intraocular pressure and protect against glaucoma. *PLoS Genet.* **16**, e1008682 (2020).
16. Sun, B. B. *et al.* Genetic associations of protein-coding variants in human disease. *Nature* **603**, 95–102 (2022).
17. O'Dell, B. L. Cysteine-rich intestinal protein (CRIP): a new intestinal zinc transport protein. *Nutr. Rev.* **50**, 232–233 (1992).
18. Zhang, L. *et al.* Cysteine-rich intestinal protein 1 suppresses apoptosis and chemosensitivity to 5-fluorouracil in colorectal cancer through ubiquitin-mediated Fas degradation. *J. Exp. Clin. Cancer Res.* **38**, 120 (2019).

19. Kanai, M. *et al.* Meta-analysis fine-mapping is often miscalibrated at single-variant resolution. *Cell Genom* **2**, (2022).

## Author information

### FinnGen

n

| Full Name           | Affiliation                                                                                                                                                            | E-mail                                | Role 1             | Role 2                   |
|---------------------|------------------------------------------------------------------------------------------------------------------------------------------------------------------------|---------------------------------------|--------------------|--------------------------|
| Aarno Palotie       | Institute for Molecular Medicine Finland (FIMM), HiLIFE, University of Helsinki, Helsinki, Finland; Broad Institute of MIT and Harvard; Massachusetts General Hospital | aarno.palotie@helsinki.fi             | Steering Committee | Steering Committee       |
| Mark Daly           | Institute for Molecular Medicine Finland (FIMM), HiLIFE, University of Helsinki, Helsinki, Finland; Broad Institute of MIT and Harvard; Massachusetts General Hospital | mark.daly@helsinki.fi                 | Steering Committee | Steering Committee       |
| Bridget Riley-Gills | Abbvie, Chicago, IL, United States                                                                                                                                     | bridget.rileygills@abbvie.com         | Steering Committee | Pharmaceutical companies |
| Howard Jacob        | Abbvie, Chicago, IL, United States                                                                                                                                     | howard.jacob@abbvie.com               | Steering Committee | Pharmaceutical companies |
| Coralie Violet      | Astra Zeneca, Cambridge, United Kingdom                                                                                                                                | coralie.violet@astrazeneca.com        | Steering Committee | Pharmaceutical companies |
| Slavé Petrovski     | Astra Zeneca, Cambridge, United Kingdom                                                                                                                                | slav.petrovski@astrazeneca.com        | Steering Committee | Pharmaceutical companies |
| Chia-Yen Chen       | Biogen, Cambridge, MA, United States                                                                                                                                   | chiayen.chen@biogen.com               | Steering Committee | Pharmaceutical companies |
| Sally John          | Biogen, Cambridge, MA, United States                                                                                                                                   | sally.john@biogen.com                 | Steering Committee | Pharmaceutical companies |
| George Okafo        | Boehringer Ingelheim, Ingelheim am Rhein, Germany                                                                                                                      | george.okafo@boehringer-ingelheim.com | Steering Committee | Pharmaceutical companies |

|                   |                                                         |                              |                                    |                          |
|-------------------|---------------------------------------------------------|------------------------------|------------------------------------|--------------------------|
| Robert Plenge     | Bristol Myers Squibb, New York, NY, United States       | robert.plenge@bms.com        | <a href="#">Steering Committee</a> | Pharmaceutical companies |
| Joseph Maranville | Bristol Myers Squibb, New York, NY, United States       | joseph.maranville@bms.com    | <a href="#">Steering Committee</a> | Pharmaceutical companies |
| Mark McCarthy     | Genentech, San Francisco, CA, United States             | mccarthy.mark@gene.com       | <a href="#">Steering Committee</a> | Pharmaceutical companies |
| Rion Pendergrass  | Genentech, San Francisco, CA, United States             | penders2@gene.com            | <a href="#">Steering Committee</a> | Pharmaceutical companies |
| Jonathan Davitte  | GlaxoSmithKline, Collegeville, PA, United States        | jonathan.m.davitte@gsk.com   | <a href="#">Steering Committee</a> | Pharmaceutical companies |
| Kirsi Auro        | GlaxoSmithKline, Espoo, Finland                         | kirsi.x.auro@gsk.com         | <a href="#">Steering Committee</a> | Pharmaceutical companies |
| Simonne Longerich | Merck, Kenilworth, NJ, United States                    | simonne.longerich@merck.com  | <a href="#">Steering Committee</a> | Pharmaceutical companies |
| Anders Målarstig  | Pfizer, New York, NY, United States                     | anders.malarstig@pfizer.com  | <a href="#">Steering Committee</a> | Pharmaceutical companies |
| Anna Vlahiotis    | Pfizer, New York, NY, United States                     | anna.vlahiotis@pfizer.com    | <a href="#">Steering Committee</a> | Pharmaceutical companies |
| Katherine Klinger | Translational Sciences, Sanofi R&D, Framingham, MA, USA | katherine.klinger@sanofi.com | <a href="#">Steering Committee</a> | Pharmaceutical companies |
| Clement Chatelain | Translational Sciences, Sanofi R&D, Framingham, MA, USA | clement.chatelain@sanofi.com | <a href="#">Steering Committee</a> | Pharmaceutical companies |
| Jorg Blankenstein | Translational Sciences, Sanofi R&D, Framingham, MA, USA | jorg.blankenstein@sanofi.com | <a href="#">Steering Committee</a> | Pharmaceutical companies |
| Karol Estrada     | Maze Therapeutics, San Francisco, CA, United States     | kestrada@mazetx.com          | <a href="#">Steering Committee</a> | Pharmaceutical companies |
| Robert Graham     | Maze Therapeutics, San Francisco, CA, United States     | rgraham@mazetx.com           | <a href="#">Steering Committee</a> | Pharmaceutical companies |

|                  |                                                                                                                 |                               |                           |                                              |
|------------------|-----------------------------------------------------------------------------------------------------------------|-------------------------------|---------------------------|----------------------------------------------|
| Dawn Waterworth  | Janssen Research & Development, LLC, Spring House, PA, United States                                            | dwaterwo@its.jnj.com          | <b>Steering Committee</b> | <b>Pharmaceutical companies</b>              |
| Chris O'Donnell  | Novartis Institutes for BioMedical Research, Cambridge, MA, United States                                       | chris.odonnell@novartis.com   | <b>Steering Committee</b> | <b>Pharmaceutical companies</b>              |
| Nicole Renaud    | Novartis Institutes for BioMedical Research, Cambridge, MA, United States                                       | nicole.renaud@novartis.com    | <b>Steering Committee</b> | <b>Pharmaceutical companies</b>              |
| Tomi P. Mäkelä   | HiLIFE, University of Helsinki, Finland, Finland                                                                | tomi.makela@helsinki.fi       | <b>Steering Committee</b> | <b>University of Helsinki &amp; Biobanks</b> |
| Jaakko Kaprio    | Institute for Molecular Medicine Finland (FIMM), HiLIFE, University of Helsinki, Helsinki, Finland              | jaakko.kaprio@helsinki.fi     | <b>Steering Committee</b> | <b>University of Helsinki &amp; Biobanks</b> |
| Minna Ruddock    | Arctic biobank / University of Oulu                                                                             | minna.ruddock@oulu.fi         | <b>Steering Committee</b> | <b>University of Helsinki &amp; Biobanks</b> |
| Petri Virolainen | Auria Biobank / University of Turku / Hospital District of Southwest Finland, Turku, Finland                    | petri.virolainen@tyks.fi      | <b>Steering Committee</b> | <b>University of Helsinki &amp; Biobanks</b> |
| Antti Hakanen    | Auria Biobank / University of Turku / Hospital District of Southwest Finland, Turku, Finland                    | antti.hakanen@tyks.fi         | <b>Steering Committee</b> | <b>University of Helsinki &amp; Biobanks</b> |
| Terhi Kilpi      | THL Biobank / Finnish Institute for Health and Welfare (THL), Helsinki, Finland                                 | terhi.kilpi@thl.fi            | <b>Steering Committee</b> | <b>University of Helsinki &amp; Biobanks</b> |
| Markus Perola    | THL Biobank / Finnish Institute for Health and Welfare (THL), Helsinki, Finland                                 | markus.perola@thl.fi          | <b>Steering Committee</b> | <b>University of Helsinki &amp; Biobanks</b> |
| Jukka Partanen   | Finnish Red Cross Blood Service / Finnish Hematology Registry and Clinical Biobank, Helsinki, Finland           | jukka.partanen@veripalvelu.fi | <b>Steering Committee</b> | <b>University of Helsinki &amp; Biobanks</b> |
| Taneli Raivio    | Helsinki Biobank / Helsinki University and Hospital District of Helsinki and Uusimaa, Helsinki                  | taneli.raivio@hus.fi          | <b>Steering Committee</b> | <b>University of Helsinki &amp; Biobanks</b> |
| Jani Tikkanen    | Northern Finland Biobank Borealis / University of Oulu / Northern Ostrobothnia Hospital District, Oulu, Finland | jani.tikkanen@pohde.fi        | <b>Steering Committee</b> | <b>University of Helsinki &amp; Biobanks</b> |
| Raisa Serpi      | Northern Finland Biobank Borealis / University of Oulu / Northern Ostrobothnia Hospital District, Oulu, Finland | rais.serpi@oulu.fi            | <b>Steering Committee</b> | <b>University of Helsinki &amp; Biobanks</b> |

|                      |                                                                                                               |                                           |                      |                                   |
|----------------------|---------------------------------------------------------------------------------------------------------------|-------------------------------------------|----------------------|-----------------------------------|
| Kati Kristiansson    | Finnish Clinical Biobank Tampere / University of Tampere / Pirkanmaa Hospital District, Tampere, Finland      | kati.kristiansson@pirha.fi                | Steering Committee   | University of Helsinki & Biobanks |
| Veli-Matti Kosma     | Biobank of Eastern Finland / University of Eastern Finland / Northern Savo Hospital District, Kuopio, Finland | veli-matti.kosma@uef.fi                   | Steering Committee   | University of Helsinki & Biobanks |
| Jari Laukkanen       | Central Finland Biobank / University of Jyväskylä / Central Finland Health Care District, Jyväskylä, Finland  | jari.laukkanen@hyvaks.fi                  | Steering Committee   | University of Helsinki & Biobanks |
| Marco Hautalahti     | FINBB - Finnish biobank cooperative                                                                           | marco.hautalahti@finbb.fi                 | Steering Committee   | University of Helsinki & Biobanks |
| Outi Tuovila         | Business Finland, Helsinki, Finland                                                                           | outi.tuovila@businessfinland.fi           | Steering Committee   | Other Experts/ Non-Voting Members |
| Jeffrey Waring       | Abbvie, Chicago, IL, United States                                                                            | jeff.waring@abbvie.com                    | Scientific Committee | Pharmaceutical companies          |
| Bridget Riley-Gillis | Abbvie, Chicago, IL, United States                                                                            | bridget.rileygillis@abbvie.com            | Scientific Committee | Pharmaceutical companies          |
| Fedik Rahimov        | Abbvie, Chicago, IL, United States                                                                            | fedik.rahimov@abbvie.com                  | Scientific Committee | Pharmaceutical companies          |
| Ioanna Tachmazidou   | Astra Zeneca, Cambridge, United Kingdom                                                                       | ioanna.tachmazidou@astrazeneca.com        | Scientific Committee | Pharmaceutical companies          |
| Chia-Yen Chen        | Biogen, Cambridge, MA, United States                                                                          | chiayen.chen@biogen.com                   | Scientific Committee | Pharmaceutical companies          |
| Zhihao Ding          | Boehringer Ingelheim, Ingelheim am Rhein, Germany                                                             | zhihao.ding@boehringer-ingelheim.com      | Scientific Committee | Pharmaceutical companies          |
| Marc Jung            | Boehringer Ingelheim, Ingelheim am Rhein, Germany                                                             | marc_oliver.jung@boehringer-ingelheim.com | Scientific Committee | Pharmaceutical companies          |
| Hanati Tuoken        | Boehringer Ingelheim, Ingelheim am Rhein, Germany                                                             | hanati.tuoken@boehringer-ingelheim.com    | Scientific Committee | Pharmaceutical companies          |

|                         |                                                                           |                                   |                      |                          |
|-------------------------|---------------------------------------------------------------------------|-----------------------------------|----------------------|--------------------------|
| Shameek Biswas          | Bristol Myers Squibb, New York, NY, United States                         | Shameek.Biswas@bms.com            | Scientific Committee | Pharmaceutical companies |
| Rion Pendergrass        | Genentech, San Francisco, CA, United States                               | penders2@genetec.com              | Scientific Committee | Pharmaceutical companies |
| Jonathan Davitte        | GlaxoSmithKline, Collegeville, PA, United States                          | jonathan.m.davitte@gsk.com        | Scientific Committee | Pharmaceutical companies |
| Neha Raghavan           | Merck, Kenilworth, NJ, United States                                      | neha.raghavan@merck.com           | Scientific Committee | Pharmaceutical companies |
| Adriana Huertas-Vazquez | Merck, Kenilworth, NJ, United States                                      | adriana.huertas.vazquez@merck.com | Scientific Committee | Pharmaceutical companies |
| Jae-Hoon Sul            | Merck, Kenilworth, NJ, United States                                      | jae.hoon.sul@merck.com            | Scientific Committee | Pharmaceutical companies |
| Anders Målarstig        | Pfizer, New York, NY, United States                                       | anders.malarstig@pfizer.com       | Scientific Committee | Pharmaceutical companies |
| Xinli Hu                | Pfizer, New York, NY, United States                                       | xinli.hu@pfizer.com               | Scientific Committee | Pharmaceutical companies |
| Åsa Hedman              | Pfizer, New York, NY, United States                                       | asa.hedman@pfizer.com             | Scientific Committee | Pharmaceutical companies |
| Katherine Klinger       | Translational Sciences, Sanofi R&D, Framingham, MA, USA                   | katherine.klinger@sanofi.com      | Scientific Committee | Pharmaceutical companies |
| Robert Graham           | Maze Therapeutics, San Francisco, CA, United States                       | rgraham@maze.com                  | Scientific Committee | Pharmaceutical companies |
| Dawn Waterworth         | Janssen Research & Development, LLC, Spring House, PA, United States      | dwaterworth@its.jnj.com           | Scientific Committee | Pharmaceutical companies |
| Nicole Renaud           | Novartis Institutes for BioMedical Research, Cambridge, MA, United States | nicole.renaud@novartis.com        | Scientific Committee | Pharmaceutical companies |
| Ma'en Obeidat           | Novartis Institutes for BioMedical Research, Cambridge, MA, United States | maen.obeidat@novartis.com         | Scientific Committee | Pharmaceutical companies |

|                       |                                                                                                                 |                               |                      |                                   |
|-----------------------|-----------------------------------------------------------------------------------------------------------------|-------------------------------|----------------------|-----------------------------------|
| Jonathan Chung        | Novartis Institutes for BioMedical Research, Cambridge, MA, United States                                       | jonathan.chung@novartis.com   | Scientific Committee | Pharmaceutical companies          |
| Jonas Zierer          | Novartis Institutes for BioMedical Research, Cambridge, MA, United States                                       | jonas.zierer@novartis.com     | Scientific Committee | Pharmaceutical companies          |
| Mari Niemi            | Novartis Institutes for BioMedical Research, Cambridge, MA, United States                                       | mari.niemi@novartis.com       | Scientific Committee | Pharmaceutical companies          |
| Samuli Ripatti        | Institute for Molecular Medicine Finland (FIMM), HiLIFE, University of Helsinki, Helsinki, Finland              | samuli.ripatti@helsinki.fi    | Scientific Committee | University of Helsinki & Biobanks |
| Johanna Schleutker    | Auria Biobank / Univ. of Turku / Hospital District of Southwest Finland, Turku, Finland                         | johanna.schleutker@utu.fi     | Scientific Committee | University of Helsinki & Biobanks |
| Markus Perola         | THL Biobank / Finnish Institute for Health and Welfare (THL), Helsinki, Finland                                 | markus.perola@thl.fi          | Scientific Committee | University of Helsinki & Biobanks |
| Mikko Arvas           | Finnish Red Cross Blood Service / Finnish Hematology Registry and Clinical Biobank, Helsinki, Finland           | mikko.arvas@veripalvelu.fi    | Scientific Committee | University of Helsinki & Biobanks |
| Olli Carpén           | Helsinki Biobank / Helsinki University and Hospital District of Helsinki and Uusimaa, Helsinki                  | olli.carpén@helsinki.fi       | Scientific Committee | University of Helsinki & Biobanks |
| Reetta Hinttala       | Northern Finland Biobank Borealis / University of Oulu / Northern Ostrobothnia Hospital District, Oulu, Finland | reetta.hinttala@oulu.fi       | Scientific Committee | University of Helsinki & Biobanks |
| Johannes Kettunen     | Northern Finland Biobank Borealis / University of Oulu / Northern Ostrobothnia Hospital District, Oulu, Finland | johannes.kettunen@oulu.fi     | Scientific Committee | University of Helsinki & Biobanks |
| Arto Mannermaa        | Biobank of Eastern Finland / University of Eastern Finland / Northern Savo Hospital District, Kuopio, Finland   | arto.mannermaa@uef.fi         | Scientific Committee | University of Helsinki & Biobanks |
| Katriina Aalto-Setälä | Faculty of Medicine and Health Technology, Tampere University, Tampere, Finland                                 | katriina.aalto-setälä@tuni.fi | Scientific Committee | University of Helsinki & Biobanks |
| Mika Kähönen          | Finnish Clinical Biobank Tampere / University of Tampere / Pirkanmaa Hospital District, Tampere, Finland        | mika.kahonen@uta.fi           | Scientific Committee | University of Helsinki & Biobanks |
| Jari Laukkanen        | Central Finland Biobank / University of Jyväskylä / Central Finland Health Care District, Jyväskylä, Finland    | jari.laukkanen@hyvaks.fi      | Scientific Committee | University of Helsinki & Biobanks |



|                   |                                                                                   |                             |                                      |                                              |
|-------------------|-----------------------------------------------------------------------------------|-----------------------------|--------------------------------------|----------------------------------------------|
| Johanna Mäkelä    | FINBB - Finnish biobank cooperative                                               | johanna.makela@finbb.fi     | <a href="#">Scientific Committee</a> | <b>University of Helsinki &amp; Biobanks</b> |
| Reetta Kälviäinen | Northern Savo Hospital District, Kuopio, Finland                                  | reetta.kalviainen@kuh.fi    | <a href="#">Clinical Groups</a>      | <b>Neurology Group</b>                       |
| Valtteri Julkunen | Northern Savo Hospital District, Kuopio, Finland                                  | valtteri.julkunen@kuh.fi    | <a href="#">Clinical Groups</a>      | <b>Neurology Group</b>                       |
| Hilkka Soininen   | Northern Savo Hospital District, Kuopio, Finland                                  | hilkka.soininen@uef.fi      | <a href="#">Clinical Groups</a>      | <b>Neurology Group</b>                       |
| Anne Remes        | Northern Ostrobothnia Hospital District, Oulu, Finland                            | anne.remes@oulu.fi          | <a href="#">Clinical Groups</a>      | <b>Neurology Group</b>                       |
| Mikko Hiltunen    | University of Eastern Finland, Kuopio, Finland                                    | mikko.hiltunen@uef.fi       | <a href="#">Clinical Groups</a>      | <b>Neurology Group</b>                       |
| Jukka Peltola     | Pirkanmaa Hospital District, Tampere, Finland                                     | jukka.peltola@pshp.fi       | <a href="#">Clinical Groups</a>      | <b>Neurology Group</b>                       |
| Minna Raivio      | Hospital District of Helsinki and Uusimaa, Helsinki, Finland                      | minna.raivio@geri.fi        | <a href="#">Clinical Groups</a>      | <b>Neurology Group</b>                       |
| Pentti Tienari    | Hospital District of Helsinki and Uusimaa, Helsinki, Finland                      | pentti.tienari@hus.fi       | <a href="#">Clinical Groups</a>      | <b>Neurology Group</b>                       |
| Juha Rinne        | Hospital District of Southwest Finland, Turku, Finland                            | juha.rinne@tyks.fi          | <a href="#">Clinical Groups</a>      | <b>Neurology Group</b>                       |
| Roosa Kallionpää  | Hospital District of Southwest Finland, Turku, Finland                            | roosa.kallionpaa@tyks.fi    | <a href="#">Clinical Groups</a>      | <b>Neurology Group</b>                       |
| Juulia Partanen   | Institute for Molecular Medicine Finland, HiLIFE, University of Helsinki, Finland | juulia.partanen@helsinki.fi | <a href="#">Clinical Groups</a>      | <b>Neurology Group</b>                       |
| Adam Ziemann      | Abbvie, Chicago, IL, United States                                                | adam.ziemann@abbvie.com     | <a href="#">Clinical Groups</a>      | <b>Neurology Group</b>                       |
| Nizar Smaoui      | Abbvie, Chicago, IL, United States                                                | nizar.smaoui@abbvie.com     | <a href="#">Clinical Groups</a>      | <b>Neurology Group</b>                       |
| Anne Lehtonen     | Abbvie, Chicago, IL, United States                                                | anne.lehtonen@abbvie.com    | <a href="#">Clinical Groups</a>      | <b>Neurology Group</b>                       |
| Susan Eaton       | Biogen, Cambridge, MA, United States                                              | susan.eaton@biogen.com      | <a href="#">Clinical Groups</a>      | <b>Neurology Group</b>                       |
| Heiko Runz        | Biogen, Cambridge, MA, United States                                              | heiko.runz@biogen.com       | <a href="#">Clinical Groups</a>      | <b>Neurology Group</b>                       |
| Sanni             | Biogen, Cambridge, MA, United States                                              | sanni.lahden                | <a href="#">Clinical</a>             | <b>Neurology</b>                             |

|                      |                                                                          |                           |                                 |                        |
|----------------------|--------------------------------------------------------------------------|---------------------------|---------------------------------|------------------------|
| Lahdenperä           |                                                                          | pera@biogen.com           | <a href="#">Clinical Groups</a> | Group                  |
| Shameek Biswas       | Bristol Myers Squibb, New York, NY, United States                        | shameek.biswas@bms.com    | <a href="#">Clinical Groups</a> | Neurology Group        |
| Natalie Bowers       | Genentech, San Francisco, CA, United States                              | bowersn1@gene.com         | <a href="#">Clinical Groups</a> | Neurology Group        |
| Edmond Teng          | Genentech, San Francisco, CA, United States                              | teng.edmond@gene.com      | <a href="#">Clinical Groups</a> | Neurology Group        |
| Rion Pendergrass     | Genentech, San Francisco, CA, United States                              | penders2@gene.com         | <a href="#">Clinical Groups</a> | Neurology Group        |
| Fanli Xu             | GlaxoSmithKline, Brentford, United Kingdom                               | chun-fang.2.xu@gsk.com    | <a href="#">Clinical Groups</a> | Neurology Group        |
| David Pulford        | GlaxoSmithKline, Stevenage, United Kingdom                               | david.x.pulford@gsk.com   | <a href="#">Clinical Groups</a> | Neurology Group        |
| Kirsi Auro           | GlaxoSmithKline, Espoo, Finland                                          | kirsi.m.auro@gsk.com      | <a href="#">Clinical Groups</a> | Neurology Group        |
| Laura Addis          | GlaxoSmithKline, Brentford, United Kingdom                               | laura.x.addis@gsk.com     | <a href="#">Clinical Groups</a> | Neurology Group        |
| John Eicher          | GlaxoSmithKline, Brentford, United Kingdom                               | john.d.eicher@gsk.com     | <a href="#">Clinical Groups</a> | Neurology Group        |
| Qingqin S Li         | Janssen Research & Development, LLC, Titusville, NJ 08560, United States | QLi2@its.jnj.com          | <a href="#">Clinical Groups</a> | Neurology Group        |
| Karen He             | Janssen Research & Development, LLC, Spring House, PA, United States     | khe2@its.jnj.com          | <a href="#">Clinical Groups</a> | Neurology Group        |
| Ekaterina Khramtsova | Janssen Research & Development, LLC, Spring House, PA, United States     | ekhramts@its.jnj.com      | <a href="#">Clinical Groups</a> | Neurology Group        |
| Neha Raghavan        | Merck, Kenilworth, NJ, United States                                     | neha.raghavan@merck.com   | <a href="#">Clinical Groups</a> | Neurology Group        |
| Martti Färkkilä      | Hospital District of Helsinki and Uusimaa, Helsinki, Finland             | martti.farkkila@hus.fi    | <a href="#">Clinical Groups</a> | Gastroenterology Group |
| Jukka Koskela        | Hospital District of Helsinki and Uusimaa, Helsinki, Finland             | jukka.koskela@helsinki.fi | <a href="#">Clinical Groups</a> | Gastroenterology Group |
| Sampsa Pikkarainen   | Hospital District of Helsinki and Uusimaa, Helsinki, Finland             | sampsa.pikkarainen@hus.fi | <a href="#">Clinical Groups</a> | Gastroenterology Group |
| Airi Jussila         | Pirkanmaa Hospital District, Tampere, Finland                            | airi.jussila@p            | <a href="#">Clinical</a>        | Gastroenter            |

|                    |                                                                                                                                                                         |                            |                        |                               |
|--------------------|-------------------------------------------------------------------------------------------------------------------------------------------------------------------------|----------------------------|------------------------|-------------------------------|
|                    |                                                                                                                                                                         | shp.fi                     | <b>Groups</b>          | <b>ology Group</b>            |
| Katri Kaukinen     | Pirkanmaa Hospital District, Tampere, Finland                                                                                                                           | katri.kaukinen@tuni.fi     | <b>Clinical Groups</b> | <b>Gastroenterology Group</b> |
| Timo Blomster      | Northern Ostrobothnia Hospital District, Oulu, Finland                                                                                                                  | timo.blomster@ppshp.fi     | <b>Clinical Groups</b> | <b>Gastroenterology Group</b> |
| Mikko Kiviniemi    | Northern Savo Hospital District, Kuopio, Finland                                                                                                                        | mikko.kiviniemi@kuh.fi     | <b>Clinical Groups</b> | <b>Gastroenterology Group</b> |
| Markku Voutilainen | Hospital District of Southwest Finland, Turku, Finland                                                                                                                  | markku.voutilainen@tyks.fi | <b>Clinical Groups</b> | <b>Gastroenterology Group</b> |
| Mark Daly          | Institute for Molecular Medicine, Finland (FIMM), HiLIFE, University of Helsinki, Helsinki, Finland; Broad Institute of MIT and Harvard; Massachusetts General Hospital | mark.daly@helsinki.fi      | <b>Clinical Groups</b> | <b>Gastroenterology Group</b> |
| Jeffrey Waring     | Abbvie, Chicago, IL, United States                                                                                                                                      | jeff.waring@abbvie.com     | <b>Clinical Groups</b> | <b>Gastroenterology Group</b> |
| Nizar Smaoui       | Abbvie, Chicago, IL, United States                                                                                                                                      | nizar.smaoui@abbvie.com    | <b>Clinical Groups</b> | <b>Gastroenterology Group</b> |
| Fedik Rahimov      | Abbvie, Chicago, IL, United States                                                                                                                                      | fedik.rahimov@abbvie.com   | <b>Clinical Groups</b> | <b>Gastroenterology Group</b> |
| Anne Lehtonen      | Abbvie, Chicago, IL, United States                                                                                                                                      | anne.lehtonen@abbvie.com   | <b>Clinical Groups</b> | <b>Gastroenterology Group</b> |
| Tim Lu             | Genentech, San Francisco, CA, United States                                                                                                                             | lut8@gene.com              | <b>Clinical Groups</b> | <b>Gastroenterology Group</b> |
| Natalie Bowers     | Genentech, San Francisco, CA, United States                                                                                                                             | bowersn1@gene.com          | <b>Clinical Groups</b> | <b>Gastroenterology Group</b> |
| Rion Pendergrass   | Genentech, San Francisco, CA, United States                                                                                                                             | penders2@gene.com          | <b>Clinical Groups</b> | <b>Gastroenterology Group</b> |
| Linda McCarthy     | GlaxoSmithKline, Brentford, United Kingdom                                                                                                                              | linda.c.mccarthy@gsk.com   | <b>Clinical Groups</b> | <b>Gastroenterology Group</b> |
| Amy Hart           | Janssen Research & Development, LLC, Spring House, PA, United States                                                                                                    | ahart13@its.jnj.com        | <b>Clinical Groups</b> | <b>Gastroenterology Group</b> |
| Meijian Guan       | Janssen Research & Development, LLC, Spring House, PA, United States                                                                                                    | mguan4@its.jnj.com         | <b>Clinical Groups</b> | <b>Gastroenterology Group</b> |
| Jason Miller       | Merck, Kenilworth, NJ, United States                                                                                                                                    | jason.miller4@merck.com    | <b>Clinical Groups</b> | <b>Gastroenterology Group</b> |
| Kirsi              | Pfizer, New York, NY, United States                                                                                                                                     | kirsi.kalpala              | <b>Clinical</b>        | <b>Gastroenter</b>            |

|                          |                                                                                                    |                                              |                        |                               |
|--------------------------|----------------------------------------------------------------------------------------------------|----------------------------------------------|------------------------|-------------------------------|
| Kalpala                  |                                                                                                    | @pfizer.com                                  | <b>Groups</b>          | <b>ology Group</b>            |
| Melissa Miller           | Pfizer, New York, NY, United States                                                                | melissa.r.miller@pfizer.com                  | <b>Clinical Groups</b> | <b>Gastroenterology Group</b> |
| Xinli Hu                 | Pfizer, New York, NY, United States                                                                | xinli.hu@pfizer.com                          | <b>Clinical Groups</b> | <b>Gastroenterology Group</b> |
| Kari Eklund              | Hospital District of Helsinki and Uusimaa, Helsinki, Finland                                       | kari.eklund@hus.fi                           | <b>Clinical Groups</b> | <b>Rheumatology Group</b>     |
| Antti Palomäki           | Hospital District of Southwest Finland, Turku, Finland                                             | ajpalo@utu.fi                                | <b>Clinical Groups</b> | <b>Rheumatology Group</b>     |
| Pia Isomäki              | Pirkanmaa Hospital District, Tampere, Finland                                                      | pia.isomaki@pshp.fi                          | <b>Clinical Groups</b> | <b>Rheumatology Group</b>     |
| Laura Pirilä             | Hospital District of Southwest Finland, Turku, Finland                                             | laura.pirila@finnet.fi, laura.pirila@tyks.fi | <b>Clinical Groups</b> | <b>Rheumatology Group</b>     |
| Oili Kaipiainen-Seppänen | Northern Savo Hospital District, Kuopio, Finland                                                   | oili.kaipiainen-seppanen@kuh.fi              | <b>Clinical Groups</b> | <b>Rheumatology Group</b>     |
| Johanna Huhtakangas      | Northern Ostrobothnia Hospital District, Oulu, Finland                                             | johanna.huhtakangas@kuh.fi                   | <b>Clinical Groups</b> | <b>Rheumatology Group</b>     |
| Nina Mars                | Institute for Molecular Medicine Finland (FIMM), HiLIFE, University of Helsinki, Helsinki, Finland | nina.mars@helsinki.fi                        | <b>Clinical Groups</b> | <b>Rheumatology Group</b>     |
| Jeffrey Waring           | Abbvie, Chicago, IL, United States                                                                 | jeff.waring@abbvie.com                       | <b>Clinical Groups</b> | <b>Rheumatology Group</b>     |
| Fedik Rahimov            | Abbvie, Chicago, IL, United States                                                                 | fedik.rahimov@abbvie.com                     | <b>Clinical Groups</b> | <b>Rheumatology Group</b>     |
| Apinya Lertratankul      | Abbvie, Chicago, IL, United States                                                                 | apinya.lertratankul@abbvie.com               | <b>Clinical Groups</b> | <b>Rheumatology Group</b>     |
| Nizar Smaoui             | Abbvie, Chicago, IL, United States                                                                 | nizar.smaoui@abbvie.com                      | <b>Clinical Groups</b> | <b>Rheumatology Group</b>     |
| Anne Lehtonen            | Abbvie, Chicago, IL, United States                                                                 | anne.lehtonen@abbvie.com                     | <b>Clinical Groups</b> | <b>Rheumatology Group</b>     |
| Coralie Viollet          | AstraZeneca, Cambridge, United Kingdom                                                             | coralie.viollet@astrazeneca.com              | <b>Clinical Groups</b> | <b>Rheumatology Group</b>     |
| Marla                    | Bristol Myers Squibb, New York, NY, United States                                                  | mhochfeld@                                   | <b>Clinical</b>        | <b>Rheumatolo</b>             |

|                        |                                                                                                                                          |                                  |                        |                           |
|------------------------|------------------------------------------------------------------------------------------------------------------------------------------|----------------------------------|------------------------|---------------------------|
| Hochfeld               |                                                                                                                                          | celgene.com                      | <b>Groups</b>          | <b>gy Group</b>           |
| Natalie Bowers         | Genentech, San Francisco, CA, United States                                                                                              | bowersn1@genetene.com            | <b>Clinical Groups</b> | <b>Rheumatology Group</b> |
| Rion Pendergrass       | Genentech, San Francisco, CA, United States                                                                                              | penders2@genetene.com            | <b>Clinical Groups</b> | <b>Rheumatology Group</b> |
| Jorge Esparza Gordillo | GlaxoSmithKline, Brentford, United Kingdom                                                                                               | jorge.x.esparza-gordillo@gsk.com | <b>Clinical Groups</b> | <b>Rheumatology Group</b> |
| Kirsi Auro             | GlaxoSmithKline, Espoo, Finland                                                                                                          | kirsi.m.auro@gsk.com             | <b>Clinical Groups</b> | <b>Rheumatology Group</b> |
| Dawn Waterworth        | Janssen Research & Development, LLC, Spring House, PA, United States                                                                     | dwaterworth@its.jnj.com          | <b>Clinical Groups</b> | <b>Rheumatology Group</b> |
| Fabiana Farias         | Merck, Kenilworth, NJ, United States                                                                                                     | fabiana.farias@merck.com         | <b>Clinical Groups</b> | <b>Rheumatology Group</b> |
| Kirsi Kalpala          | Pfizer, New York, NY, United States                                                                                                      | kirsi.kalpala@pfizer.com         | <b>Clinical Groups</b> | <b>Rheumatology Group</b> |
| Nan Bing               | Pfizer, New York, NY, United States                                                                                                      | nan.bing@pfizer.com              | <b>Clinical Groups</b> | <b>Rheumatology Group</b> |
| Xinli Hu               | Pfizer, New York, NY, United States                                                                                                      | xinli.hu@pfizer.com              | <b>Clinical Groups</b> | <b>Rheumatology Group</b> |
| Tarja Laitinen         | Pirkanmaa Hospital District, Tampere, Finland                                                                                            | tarja.laitinen@pshp.fi           | <b>Clinical Groups</b> | <b>Pulmonology Group</b>  |
| Margit Pelkonen        | Northern Savo Hospital District, Kuopio, Finland                                                                                         | margit.pelkonen@kuh.fi           | <b>Clinical Groups</b> | <b>Pulmonology Group</b>  |
| Paula Kauppi           | Hospital District of Helsinki and Uusimaa, Helsinki, Finland                                                                             | paula.kauppi@hus.fi              | <b>Clinical Groups</b> | <b>Pulmonology Group</b>  |
| Hannu Kankaanranta     | University of Gothenburg, Gothenburg, Sweden/<br>Seinäjäki Central Hospital, Seinäjoki, Finland/<br>Tampere University, Tampere, Finland | hannu.kankaanranta@tuni.fi       | <b>Clinical Groups</b> | <b>Pulmonology Group</b>  |
| Terttu Harju           | Northern Ostrobothnia Hospital District, Oulu, Finland                                                                                   | terttu.harju@oulu.fi             | <b>Clinical Groups</b> | <b>Pulmonology Group</b>  |
| Riitta Lahesmaa        | Hospital District of Southwest Finland, Turku, Finland                                                                                   | rilahes@utu.fi                   | <b>Clinical Groups</b> | <b>Pulmonology Group</b>  |
| Nizar Smaoui           | Abbvie, Chicago, IL, United States                                                                                                       | nizar.smaoui@abbvie.com          | <b>Clinical Groups</b> | <b>Pulmonology Group</b>  |
| Coralie Violette       | AstraZeneca, Cambridge, United Kingdom                                                                                                   | coralie.violet@astrazeneca.com   | <b>Clinical Groups</b> | <b>Pulmonology Group</b>  |

|                   |                                                                   |                            |                                 |                                |
|-------------------|-------------------------------------------------------------------|----------------------------|---------------------------------|--------------------------------|
|                   |                                                                   | a.com                      |                                 |                                |
| Susan Eaton       | Biogen, Cambridge, MA, United States                              | susan.eaton@biogen.com     | <a href="#">Clinical Groups</a> | Pulmonology Group              |
| Hubert Chen       | Genentech, San Francisco, CA, United States                       | chenh37@genetech.com       | <a href="#">Clinical Groups</a> | Pulmonology Group              |
| Rion Pendergrass  | Genentech, San Francisco, CA, United States                       | penders2@genetech.com      | <a href="#">Clinical Groups</a> | Pulmonology Group              |
| Natalie Bowers    | Genentech, San Francisco, CA, United States                       | bowersn1@genetech.com      | <a href="#">Clinical Groups</a> | Pulmonology Group              |
| Joanna Betts      | GlaxoSmithKline, Brentford, United Kingdom                        | joanna.c.betts@gsk.com     | <a href="#">Clinical Groups</a> | Pulmonology Group              |
| Kirsi Auro        | GlaxoSmithKline, Espoo, Finland                                   | kirsi.m.auro@gsk.com       | <a href="#">Clinical Groups</a> | Pulmonology Group              |
| Rajashree Mishra  | GlaxoSmithKline, Brentford, United Kingdom                        | rajashree.x.mishra@gsk.com | <a href="#">Clinical Groups</a> | Pulmonology Group              |
| Majd Mouded       | Novartis, Basel, Switzerland                                      | majd.mouded@novartis.com   | <a href="#">Clinical Groups</a> | Pulmonology Group              |
| Debby Ngo         | Novartis, Basel, Switzerland                                      | debby.ngo@novartis.com     | <a href="#">Clinical Groups</a> | Pulmonology Group              |
| Teemu Niiranen    | Finnish Institute for Health and Welfare (THL), Helsinki, Finland | teemu.niiranen@thl.fi      | <a href="#">Clinical Groups</a> | Cardiometabolic Diseases Group |
| Felix Vaura       | Finnish Institute for Health and Welfare (THL), Helsinki, Finland | fechva@utu.fi              | <a href="#">Clinical Groups</a> | Cardiometabolic Diseases Group |
| Veikko Salomaa    | Finnish Institute for Health and Welfare (THL), Helsinki, Finland | veikko.salomaa@thl.fi      | <a href="#">Clinical Groups</a> | Cardiometabolic Diseases Group |
| Kaj Metsärinne    | Hospital District of Southwest Finland, Turku, Finland            | kaj.metsarinne@tyks.fi     | <a href="#">Clinical Groups</a> | Cardiometabolic Diseases Group |
| Jenni Aittokallio | Hospital District of Southwest Finland, Turku, Finland            | jemato@utu.fi              | <a href="#">Clinical Groups</a> | Cardiometabolic Diseases       |

|                       |                                                                                                                                                                                             |                                   |                                 |                                                       |
|-----------------------|---------------------------------------------------------------------------------------------------------------------------------------------------------------------------------------------|-----------------------------------|---------------------------------|-------------------------------------------------------|
| Mika Kähönen          | Pirkanmaa Hospital District, Tampere, Finland                                                                                                                                               | mika.kahonen@uta.fi               | <a href="#">Clinical Groups</a> | <b>Group</b><br><b>Cardiometabolic Diseases Group</b> |
| Jussi Hernesniemi     | Pirkanmaa Hospital District, Tampere, Finland                                                                                                                                               | jussi.hernesniemi@tuni.fi         | <a href="#">Clinical Groups</a> | <b>Cardiometabolic Diseases Group</b>                 |
| Daniel Gordin         | Hospital District of Helsinki and Uusimaa, Helsinki, Finland                                                                                                                                | daniel.gordin@hus.fi              | <a href="#">Clinical Groups</a> | <b>Cardiometabolic Diseases Group</b>                 |
| Juha Sinisalo         | Hospital District of Helsinki and Uusimaa, Helsinki, Finland                                                                                                                                | juha.sinisalo@hus.fi              | <a href="#">Clinical Groups</a> | <b>Cardiometabolic Diseases Group</b>                 |
| Marja-Riitta Taskinen | Hospital District of Helsinki and Uusimaa, Helsinki, Finland                                                                                                                                | marja-riitta.taskinen@helsinki.fi | <a href="#">Clinical Groups</a> | <b>Cardiometabolic Diseases Group</b>                 |
| Tiinamaija Tuomi      | Hospital District of Helsinki and Uusimaa, Helsinki, Finland                                                                                                                                | tiinamaija.tuomi@hus.fi           | <a href="#">Clinical Groups</a> | <b>Cardiometabolic Diseases Group</b>                 |
| Timo Hiltunen         | Hospital District of Helsinki and Uusimaa, Helsinki, Finland                                                                                                                                | timo.hiltunen@hus.fi              | <a href="#">Clinical Groups</a> | <b>Cardiometabolic Diseases Group</b>                 |
| Jari Laukkanen        | Central Finland Health Care District, Jyväskylä, Finland                                                                                                                                    | jari.laukkanen@hyvaks.fi          | <a href="#">Clinical Groups</a> | <b>Cardiometabolic Diseases Group</b>                 |
| Amanda Elliott        | Institute for Molecular Medicine Finland (FIMM), HiLIFE, University of Helsinki, Helsinki, Finland; Broad Institute, Cambridge, MA, USA and Massachusetts General Hospital, Boston, MA, USA | aelliott@broadinstitute.org       | <a href="#">Clinical Groups</a> | <b>Cardiometabolic Diseases Group</b>                 |
| Mary Pat Reeve        | Institute for Molecular Medicine Finland (FIMM), HiLIFE, University of Helsinki, Helsinki, Finland                                                                                          | mary.reeve@helsinki.fi            | <a href="#">Clinical Groups</a> | <b>Cardiometabolic Diseases Group</b>                 |
| Sanni Ruotsalainen    | Institute for Molecular Medicine Finland (FIMM), HiLIFE, University of Helsinki, Helsinki, Finland                                                                                          | sanni.ruotsalainen@helsinki.fi    | <a href="#">Clinical Groups</a> | <b>Cardiometabolic</b>                                |

|                  |                                                                                                                                      |                             |                                 |                                       |
|------------------|--------------------------------------------------------------------------------------------------------------------------------------|-----------------------------|---------------------------------|---------------------------------------|
| en               |                                                                                                                                      | ki.fi                       |                                 | <b>Diseases Group</b>                 |
| Dirk Paul        | Astra Zeneca, Cambridge, United Kingdom                                                                                              | dirk.paul@astrazeneca.com   | <a href="#">Clinical Groups</a> | <b>Cardiometabolic Diseases Group</b> |
| Natalie Bowers   | Genentech, San Francisco, CA, United States                                                                                          | bowersn1@genentech.com      | <a href="#">Clinical Groups</a> | <b>Cardiometabolic Diseases Group</b> |
| Rion Pendergrass | Genentech, San Francisco, CA, United States                                                                                          | penders2@genentech.com      | <a href="#">Clinical Groups</a> | <b>Cardiometabolic Diseases Group</b> |
| Audrey Chu       | GlaxoSmithKline, Brentford, United Kingdom                                                                                           | audrey.y.chu@gsk.com        | <a href="#">Clinical Groups</a> | <b>Cardiometabolic Diseases Group</b> |
| Kirsi Auro       | GlaxoSmithKline, Espoo, Finland                                                                                                      | kirsi.m.auro@gsk.com        | <a href="#">Clinical Groups</a> | <b>Cardiometabolic Diseases Group</b> |
| Dermot Reilly    | Janssen Research & Development, LLC, Boston, MA, United States                                                                       | dreill11@its.jnj.com        | <a href="#">Clinical Groups</a> | <b>Cardiometabolic Diseases Group</b> |
| Mike Mendelson   | Novartis, Boston, MA, United States                                                                                                  | mike.mendelson@novartis.com | <a href="#">Clinical Groups</a> | <b>Cardiometabolic Diseases Group</b> |
| Jaakko Parkkinen | Pfizer, New York, NY, United States                                                                                                  | jaakko.parkkinen@pfizer.com | <a href="#">Clinical Groups</a> | <b>Cardiometabolic Diseases Group</b> |
| Melissa Miller   | Pfizer, New York, NY, United States                                                                                                  | melissa.r.miller@pfizer.com | <a href="#">Clinical Groups</a> | <b>Cardiometabolic Diseases Group</b> |
| Tuomo Meretoja   | Department of Breast Surgery, Helsinki University Hospital Comprehensive Cancer Center and University of Helsinki, Helsinki, Finland | tuomo.meretoja@hus.fi       | <a href="#">Clinical Groups</a> | <b>Oncology Group</b>                 |
| Heikki Joensuu   | Department of Oncology, Helsinki University Hospital Comprehensive Cancer Center and University of                                   | heikki.joensuu@hus.fi       | <a href="#">Clinical Groups</a> | <b>Oncology Group</b>                 |



|                             |                                                                                                                                                                        |                                 |                                 |                       |
|-----------------------------|------------------------------------------------------------------------------------------------------------------------------------------------------------------------|---------------------------------|---------------------------------|-----------------------|
| Helsinki, Helsinki, Finland |                                                                                                                                                                        |                                 |                                 |                       |
| Olli Carpén                 | Hospital District of Helsinki and Uusimaa, Helsinki, Finland                                                                                                           | olli.carp@helsinki.fi           | <a href="#">Clinical Groups</a> | <b>Oncology Group</b> |
| Johanna Mattson             | Hospital District of Helsinki and Uusimaa, Helsinki, Finland                                                                                                           | johanna.mattson@hus.fi          | <a href="#">Clinical Groups</a> | <b>Oncology Group</b> |
| Eveliina Salminen           | Hospital District of Helsinki and Uusimaa, Helsinki, Finland                                                                                                           | eveliina.e.salminen@hus.fi      | <a href="#">Clinical Groups</a> | <b>Oncology Group</b> |
| Annika Auranen              | Pirkanmaa Hospital District, Tampere, Finland                                                                                                                          | anaura@utu.fi                   | <a href="#">Clinical Groups</a> | <b>Oncology Group</b> |
| Peeter Karihtala            | Department of Oncology, Helsinki University Hospital Comprehensive Cancer Center and University of Helsinki, Helsinki, Finland                                         | peeter.karihtala@hus.fi         | <a href="#">Clinical Groups</a> | <b>Oncology Group</b> |
| Päivi Auvinen               | Northern Savo Hospital District, Kuopio, Finland                                                                                                                       | paivi.auvinen@kuh.fi            | <a href="#">Clinical Groups</a> | <b>Oncology Group</b> |
| Klaus Elenius               | Hospital District of Southwest Finland, Turku, Finland                                                                                                                 | klaus.elenius@utu.fi            | <a href="#">Clinical Groups</a> | <b>Oncology Group</b> |
| Johanna Schleutker          | Hospital District of Southwest Finland, Turku, Finland                                                                                                                 | johanna.schleutker@utu.fi       | <a href="#">Clinical Groups</a> | <b>Oncology Group</b> |
| Esa Pitkänen                | Institute for Molecular Medicine Finland (FIMM), HiLIFE, University of Helsinki, Helsinki, Finland                                                                     | esa.pitkanen@helsinki.fi        | <a href="#">Clinical Groups</a> | <b>Oncology Group</b> |
| Nina Mars                   | Institute for Molecular Medicine Finland (FIMM), HiLIFE, University of Helsinki, Helsinki, Finland                                                                     | nina.mars@helsinki.fi           | <a href="#">Clinical Groups</a> | <b>Oncology Group</b> |
| Mark Daly                   | Institute for Molecular Medicine Finland (FIMM), HiLIFE, University of Helsinki, Helsinki, Finland; Broad Institute of MIT and Harvard; Massachusetts General Hospital | mark.daly@helsinki.fi           | <a href="#">Clinical Groups</a> | <b>Oncology Group</b> |
| Relja Popovic               | Abbvie, Chicago, IL, United States                                                                                                                                     | relja.popovic@abbvie.com        | <a href="#">Clinical Groups</a> | <b>Oncology Group</b> |
| Jeffrey Waring              | Abbvie, Chicago, IL, United States                                                                                                                                     | jeff.waring@abbvie.com          | <a href="#">Clinical Groups</a> | <b>Oncology Group</b> |
| Bridget Riley-Gillis        | Abbvie, Chicago, IL, United States                                                                                                                                     | bridget.rileygillis@abbvie.com  | <a href="#">Clinical Groups</a> | <b>Oncology Group</b> |
| Anne Lehtonen               | Abbvie, Chicago, IL, United States                                                                                                                                     | anne.lehtonen@abbvie.com        | <a href="#">Clinical Groups</a> | <b>Oncology Group</b> |
| Margarete Fabre             | AstraZeneca, Cambridge, United Kingdom                                                                                                                                 | margarete.fabre@astrazeneca.com | <a href="#">Clinical Groups</a> | <b>Oncology Group</b> |

|                    |                                                                                                                                               |                              |                                 |                    |
|--------------------|-----------------------------------------------------------------------------------------------------------------------------------------------|------------------------------|---------------------------------|--------------------|
| Jennifer Schutzman | Genentech, San Francisco, CA, United States                                                                                                   | schutzman.jennifer@gene.com  | <a href="#">Clinical Groups</a> | Oncology Group     |
| Natalie Bowers     | Genentech, San Francisco, CA, United States                                                                                                   | bowersn1@gene.com            | <a href="#">Clinical Groups</a> | Oncology Group     |
| Rion Pendergrass   | Genentech, San Francisco, CA, United States                                                                                                   | penders2@gene.com            | <a href="#">Clinical Groups</a> | Oncology Group     |
| Diptee Kulkarni    | GlaxoSmithKline, Brentford, United Kingdom                                                                                                    | diptee.a.kulkarni@gsk.com    | <a href="#">Clinical Groups</a> | Oncology Group     |
| Kirsi Auro         | GlaxoSmithKline, Espoo, Finland                                                                                                               | kirsi.m.auro@gsk.com         | <a href="#">Clinical Groups</a> | Oncology Group     |
| Alessandro Porello | Janssen Research & Development, LLC, Spring House, PA, United States                                                                          | APorrell@ITS.JNJ.com         | <a href="#">Clinical Groups</a> | Oncology Group     |
| Andrey Loboda      | Merck, Kenilworth, NJ, United States                                                                                                          | andrey_loboda@merck.com      | <a href="#">Clinical Groups</a> | Oncology Group     |
| Heli Lehtonen      | Pfizer, New York, NY, United States                                                                                                           | heli.lehtonen@pfizer.com     | <a href="#">Clinical Groups</a> | Oncology Group     |
| Stefan McDonough   | Pfizer, New York, NY, United States                                                                                                           | stefan.McDonough@pfizer.com  | <a href="#">Clinical Groups</a> | Oncology Group     |
| Sauli Vuoti        | Janssen-Cilag Oy, Espoo, Finland                                                                                                              | svuoti@its.jnj.com           | <a href="#">Clinical Groups</a> | Oncology Group     |
| Kai Kaarniranta    | Northern Savo Hospital District, Kuopio, Finland; Department of Molecular Genetics, University of Lodz, Lodz, Poland                          | kai.kaarniranta@uef.fi       | <a href="#">Clinical Groups</a> | Opthalmology Group |
| Joni A Turunen     | Helsinki University Hospital and University of Helsinki, Helsinki, Finland; Eye Genetics Group, Folkhälsan Research Center, Helsinki, Finland | joni.turunen@helsinki.fi     | <a href="#">Clinical Groups</a> | Opthalmology Group |
| Terhi Ollila       | Hospital District of Helsinki and Uusimaa, Helsinki, Finland                                                                                  | terhi.ollila@helsinki.fi     | <a href="#">Clinical Groups</a> | Opthalmology Group |
| Hannu Uusitalo     | Pirkanmaa Hospital District, Tampere, Finland                                                                                                 | hannu.uusitalo@tuni.fi       | <a href="#">Clinical Groups</a> | Opthalmology Group |
| Juha Karjalainen   | Institute for Molecular Medicine Finland (FIMM), HiLIFE, University of Helsinki, Helsinki, Finland                                            | juha.karjalainen@helsinki.fi | <a href="#">Clinical Groups</a> | Opthalmology Group |
| Esa Pitkänen       | Institute for Molecular Medicine Finland (FIMM), HiLIFE, University of Helsinki, Helsinki, Finland                                            | esa.pitkanen@helsinki.fi     | <a href="#">Clinical Groups</a> | Opthalmology Group |
| Mengzhen           | Abbvie, Chicago, IL, United States                                                                                                            | mengzhen.liu                 | <a href="#">Clinical</a>        | Opthalmology       |

|                                 |                                                                 |                                         |                            |                                 |
|---------------------------------|-----------------------------------------------------------------|-----------------------------------------|----------------------------|---------------------------------|
| Liu                             |                                                                 | @abbvie.co<br>m                         | <b>Clinical<br/>Groups</b> | <b>gy Group</b>                 |
| Heiko<br>Runz                   | Biogen, Cambridge, MA, United States                            | heiko.runz@<br>biogen.com               | <b>Clinical<br/>Groups</b> | <b>Ophthalmolo<br/>gy Group</b> |
| Stephanie<br>Loomis             | Biogen, Cambridge, MA, United States                            | stephanie.loo<br>mis@biogen.<br>com     | <b>Clinical<br/>Groups</b> | <b>Ophthalmolo<br/>gy Group</b> |
| Erich<br>Strauss                | Genentech, San Francisco, CA, United States                     | strauss.erich<br>@gene.com              | <b>Clinical<br/>Groups</b> | <b>Ophthalmolo<br/>gy Group</b> |
| Natalie<br>Bowers               | Genentech, San Francisco, CA, United States                     | bowersn1@g<br>ene.com                   | <b>Clinical<br/>Groups</b> | <b>Ophthalmolo<br/>gy Group</b> |
| Hao Chen                        | Genentech, San Francisco, CA, United States                     | haoc@gene.<br>com                       | <b>Clinical<br/>Groups</b> | <b>Ophthalmolo<br/>gy Group</b> |
| Rion<br>Pendergra<br>ss         | Genentech, San Francisco, CA, United States                     | penders2@g<br>ene.com                   | <b>Clinical<br/>Groups</b> | <b>Ophthalmolo<br/>gy Group</b> |
| Kaisa<br>Tasanen                | Northern Ostrobothnia Hospital District, Oulu, Finland          | kaisa.tasane<br>n-maatta@ou<br>lu.fi    | <b>Clinical<br/>Groups</b> | <b>Dermatolog<br/>y Group</b>   |
| Laura<br>Huilaja                | Northern Ostrobothnia Hospital District, Oulu, Finland          | laura.huilaja<br>@oulu.fi               | <b>Clinical<br/>Groups</b> | <b>Dermatolog<br/>y Group</b>   |
| Katariina<br>Hannula-J<br>ouppi | Hospital District of Helsinki and Uusimaa, Helsinki,<br>Finland | katariina.han<br>nula-jouppi@<br>hus.fi | <b>Clinical<br/>Groups</b> | <b>Dermatolog<br/>y Group</b>   |
| Teea Salmi                      | Pirkanmaa Hospital District, Tampere, Finland                   | teea.salmi@<br>pshp.fi                  | <b>Clinical<br/>Groups</b> | <b>Dermatolog<br/>y Group</b>   |
| Sirkku<br>Peltonen              | Hospital District of Southwest Finland, Turku, Finland          | sipelto@utu.fi                          | <b>Clinical<br/>Groups</b> | <b>Dermatolog<br/>y Group</b>   |
| Leena<br>Koulu                  | Hospital District of Southwest Finland, Turku, Finland          | leena.koulu<br>@tyks.fi                 | <b>Clinical<br/>Groups</b> | <b>Dermatolog<br/>y Group</b>   |
| Nizar<br>Smaoui                 | Abbvie, Chicago, IL, United States                              | nizar.smaoui<br>@abbvie.co<br>m         | <b>Clinical<br/>Groups</b> | <b>Dermatolog<br/>y Group</b>   |
| Fedik<br>Rahimov                | Abbvie, Chicago, IL, United States                              | fedik.rahimov<br>@abbvie.co<br>m        | <b>Clinical<br/>Groups</b> | <b>Dermatolog<br/>y Group</b>   |
| Anne<br>Lehtonen                | Abbvie, Chicago, IL, United States                              | anne.lehtone<br>n@abbvie.co<br>m        | <b>Clinical<br/>Groups</b> | <b>Dermatolog<br/>y Group</b>   |
| David<br>Choy                   | Genentech, San Francisco, CA, United States                     | choy.david@<br>gene.com                 | <b>Clinical<br/>Groups</b> | <b>Dermatolog<br/>y Group</b>   |

|                  |                                                                                                                                                                                             |                             |                                 |                          |
|------------------|---------------------------------------------------------------------------------------------------------------------------------------------------------------------------------------------|-----------------------------|---------------------------------|--------------------------|
| Rion Pendergrass | Genentech, San Francisco, CA, United States                                                                                                                                                 | penders2@gene.com           | <a href="#">Clinical Groups</a> | <b>Dermatology Group</b> |
| Dawn Waterworth  | Janssen Research & Development, LLC, Spring House, PA, United States                                                                                                                        | dwaterworth@its.jnj.com     | <a href="#">Clinical Groups</a> | <b>Dermatology Group</b> |
| Kirsi Kalpala    | Pfizer, New York, NY, United States                                                                                                                                                         | kirsi.kalpala@pfizer.com    | <a href="#">Clinical Groups</a> | <b>Dermatology Group</b> |
| Ying Wu          | Pfizer, New York, NY, United States                                                                                                                                                         | ying.wu3@pfizer.com         | <a href="#">Clinical Groups</a> | <b>Dermatology Group</b> |
| Pirkko Pussinen  | Hospital District of Helsinki and Uusimaa, Helsinki, Finland                                                                                                                                | pirkko.pussinen@helsinki.fi | <a href="#">Clinical Groups</a> | <b>Odontology Group</b>  |
| Aino Salminen    | Hospital District of Helsinki and Uusimaa, Helsinki, Finland                                                                                                                                | aino.m.salmi@helsinki.fi    | <a href="#">Clinical Groups</a> | <b>Odontology Group</b>  |
| Tuula Salo       | Hospital District of Helsinki and Uusimaa, Helsinki, Finland                                                                                                                                | tuula.salo@helsinki.fi      | <a href="#">Clinical Groups</a> | <b>Odontology Group</b>  |
| David Rice       | Hospital District of Helsinki and Uusimaa, Helsinki, Finland                                                                                                                                | david.rice@helsinki.fi      | <a href="#">Clinical Groups</a> | <b>Odontology Group</b>  |
| Pekka Nieminen   | Hospital District of Helsinki and Uusimaa, Helsinki, Finland                                                                                                                                | pekka.nieminen@helsinki.fi  | <a href="#">Clinical Groups</a> | <b>Odontology Group</b>  |
| Ulla Palotie     | Hospital District of Helsinki and Uusimaa, Helsinki, Finland                                                                                                                                | ulla.palotie@helsinki.fi    | <a href="#">Clinical Groups</a> | <b>Odontology Group</b>  |
| Maria Siponen    | Northern Savo Hospital District, Kuopio, Finland                                                                                                                                            | maria.siponen@uef.fi        | <a href="#">Clinical Groups</a> | <b>Odontology Group</b>  |
| Liisa Suominen   | Northern Savo Hospital District, Kuopio, Finland                                                                                                                                            | liisa.suominen@uef.fi       | <a href="#">Clinical Groups</a> | <b>Odontology Group</b>  |
| Päivi Mäntylä    | Northern Savo Hospital District, Kuopio, Finland                                                                                                                                            | paivi.mantyla@uef.fi        | <a href="#">Clinical Groups</a> | <b>Odontology Group</b>  |
| Ulvi Gursoy      | Hospital District of Southwest Finland, Turku, Finland                                                                                                                                      | ulvi.gursoy@utu.fi          | <a href="#">Clinical Groups</a> | <b>Odontology Group</b>  |
| Vuokko Anttonen  | Northern Ostrobothnia Hospital District, Oulu, Finland                                                                                                                                      | vuokko.anttonen@oulu.fi     | <a href="#">Clinical Groups</a> | <b>Odontology Group</b>  |
| Kirsi Sipilä     | Research Unit of Oral Health Sciences Faculty of Medicine, University of Oulu, Oulu, Finland; Medical Research Center, Oulu, Oulu University Hospital and University of Oulu, Oulu, Finland | kirsi.sipila@oulu.fi        | <a href="#">Clinical Groups</a> | <b>Odontology Group</b>  |
| Rion Pendergrass | Genentech, San Francisco, CA, United States                                                                                                                                                 | pendergross.sarah@gene.com  | <a href="#">Clinical Groups</a> | <b>Odontology Group</b>  |

|                         |                                                                                                    |                                 |                                                                       |
|-------------------------|----------------------------------------------------------------------------------------------------|---------------------------------|-----------------------------------------------------------------------|
| ss                      |                                                                                                    | com                             |                                                                       |
| Hannele Laivuori        | Institute for Molecular Medicine Finland (FIMM), HiLIFE, University of Helsinki, Helsinki, Finland | hannele.laivuori@helsinki.fi    | <a href="#">Clinical Groups</a> Women's Health and Reproduction Group |
| Venla Kurra             | Pirkanmaa Hospital District, Tampere, Finland                                                      | venla.kurra@tuni.fi             | <a href="#">Clinical Groups</a> Women's Health and Reproduction Group |
| Laura Kotaniemi-Talonen | Pirkanmaa Hospital District, Tampere, Finland                                                      | laura.kotaniemi-talonen@tuni.fi | <a href="#">Clinical Groups</a> Women's Health and Reproduction Group |
| Oskari Heikinheimo      | Hospital District of Helsinki and Uusimaa, Helsinki, Finland                                       | oskari.heikinheimo@helsinki.fi  | <a href="#">Clinical Groups</a> Women's Health and Reproduction Group |
| Ilkka Kalliala          | Hospital District of Helsinki and Uusimaa, Helsinki, Finland                                       | ilkka.kalliala@hus.fi           | <a href="#">Clinical Groups</a> Women's Health and Reproduction Group |
| Lauri Aaltonen          | Hospital District of Helsinki and Uusimaa, Helsinki, Finland                                       | lauri.aaltonen@helsinki.fi      | <a href="#">Clinical Groups</a> Women's Health and Reproduction Group |
| Varpu Jokimaa           | Hospital District of Southwest Finland, Turku, Finland                                             | varpu.jokimaa@utu.fi            | <a href="#">Clinical Groups</a> Women's Health and Reproduction Group |
| Johannes Kettunen       | Northern Ostrobothnia Hospital District, Oulu, Finland                                             | Johannes.Kettunen@oulu.fi       | <a href="#">Clinical Groups</a> Women's Health and Reproduction Group |
| Marja Vääräsmäki        | Northern Ostrobothnia Hospital District, Oulu, Finland                                             | marja.vaarasmaki@oulu.fi        | <a href="#">Clinical Groups</a> Women's Health and Reproduction Group |
| Outi Uimari             | Northern Ostrobothnia Hospital District, Oulu, Finland                                             | outi.uimari@oulu.fi             | <a href="#">Clinical Groups</a> Women's Health and Reproduction Group |
| Laure Morin-Pap         | Northern Ostrobothnia Hospital District, Oulu, Finland                                             | lmp@cc.oulu.fi                  | <a href="#">Clinical Groups</a> Women's Health and                    |

|                  |                                                                                                                                                                        |                             |                        |                                              |
|------------------|------------------------------------------------------------------------------------------------------------------------------------------------------------------------|-----------------------------|------------------------|----------------------------------------------|
| unen             |                                                                                                                                                                        |                             |                        | <b>Reproduction Group</b>                    |
| Maarit Niinimäki | Northern Ostrobothnia Hospital District, Oulu, Finland                                                                                                                 | maarit.niinimäki@oulu.fi    | <b>Clinical Groups</b> | <b>Women's Health and Reproduction Group</b> |
| Terhi Pilttonen  | Northern Ostrobothnia Hospital District, Oulu, Finland                                                                                                                 | terhi.pilttonen@oulu.fi     | <b>Clinical Groups</b> | <b>Women's Health and Reproduction Group</b> |
| Katja Kivinen    | Institute for Molecular Medicine Finland (FIMM), HiLIFE, University of Helsinki, Helsinki, Finland                                                                     | katja.kivinen@helsinki.fi   | <b>Clinical Groups</b> | <b>Women's Health and Reproduction Group</b> |
| Elisabeth Widen  | Institute for Molecular Medicine Finland (FIMM), HiLIFE, University of Helsinki, Helsinki, Finland                                                                     | elisabeth.widen@helsinki.fi | <b>Clinical Groups</b> | <b>Women's Health and Reproduction Group</b> |
| Taru Tukiainen   | Institute for Molecular Medicine Finland (FIMM), HiLIFE, University of Helsinki, Helsinki, Finland                                                                     | taru.tukiainen@helsinki.fi  | <b>Clinical Groups</b> | <b>Women's Health and Reproduction Group</b> |
| Mary Pat Reeve   | Institute for Molecular Medicine Finland (FIMM), HiLIFE, University of Helsinki, Helsinki, Finland                                                                     | mary.reeve@helsinki.fi      | <b>Clinical Groups</b> | <b>Women's Health and Reproduction Group</b> |
| Mark Daly        | Institute for Molecular Medicine Finland (FIMM), HiLIFE, University of Helsinki, Helsinki, Finland; Broad Institute of MIT and Harvard; Massachusetts General Hospital | mark.daly@helsinki.fi       | <b>Clinical Groups</b> | <b>Women's Health and Reproduction Group</b> |
| Niko Välimäki    | University of Helsinki, Helsinki, Finland                                                                                                                              | niko.valimaki@helsinki.fi   | <b>Clinical Groups</b> | <b>Women's Health and Reproduction Group</b> |
| Eija Laakkonen   | University of Jyväskylä, Jyväskylä, Finland                                                                                                                            | eija.k.laakkonen@jyu.fi     | <b>Clinical Groups</b> | <b>Women's Health and Reproduction Group</b> |
| Jaakko Tyrmi     | University of Oulu, Oulu, Finland / University of Tampere, Tampere, Finland                                                                                            | jaakko.tyrmi@oulu.fi        | <b>Clinical Groups</b> | <b>Women's Health and Reproduction Group</b> |
| Heidi            | University of Oulu, Oulu, Finland                                                                                                                                      | heidi.silven@               | <b>Clinical</b>        | <b>Women's</b>                               |

|                      |                                                  |                                |                        |                                              |
|----------------------|--------------------------------------------------|--------------------------------|------------------------|----------------------------------------------|
| Silven               |                                                  | student oulu.fi                | <b>Groups</b>          | <b>Health and Reproduction Group</b>         |
| Eeva Sliz            | University of Oulu, Oulu, Finland                | eeva.sliz@oulu.fi              | <b>Clinical Groups</b> | <b>Women's Health and Reproduction Group</b> |
| Riikka Arffman       | University of Oulu, Oulu, Finland                | riikka.arffman@oulu.fi         | <b>Clinical Groups</b> | <b>Women's Health and Reproduction Group</b> |
| Susanna Savukoski    | University of Oulu, Oulu, Finland                | susanna.savukoski@oulu.fi      | <b>Clinical Groups</b> | <b>Women's Health and Reproduction Group</b> |
| Triin Laisk          | Estonian biobank, Tartu, Estonia                 | triin.laisk@ut.ee              | <b>Clinical Groups</b> | <b>Women's Health and Reproduction Group</b> |
| Natalia Pujol        | Estonian biobank, Tartu, Estonia                 | natalia.pujolguinaldo@oulu.fi  | <b>Clinical Groups</b> | <b>Women's Health and Reproduction Group</b> |
| Mengzhen Liu         | Abbvie, Chicago, IL, United States               | mengzhen.liu@abbvie.com        | <b>Clinical Groups</b> | <b>Women's Health and Reproduction Group</b> |
| Bridget Riley-Gillis | Abbvie, Chicago, IL, United States               | bridget.rileygillis@abbvie.com | <b>Clinical Groups</b> | <b>Women's Health and Reproduction Group</b> |
| Rion Pendergrass     | Genentech, San Francisco, CA, United States      | penders2@gene.com              | <b>Clinical Groups</b> | <b>Women's Health and Reproduction Group</b> |
| Janet Kumar          | GlaxoSmithKline, Collegeville, PA, United States | janet.x.kumar@gsk.com          | <b>Clinical Groups</b> | <b>Women's Health and Reproduction Group</b> |
| Kirsi Auro           | GlaxoSmithKline, Espoo, Finland                  | kirsi.m.auro@gsk.com           | <b>Clinical Groups</b> | <b>Women's Health and Reproduction Group</b> |

|                            |                                                                                                                                                                                                              |                                    |                                 |                                  |
|----------------------------|--------------------------------------------------------------------------------------------------------------------------------------------------------------------------------------------------------------|------------------------------------|---------------------------------|----------------------------------|
| Iiris Hovatta              | University of Helsinki, Finland                                                                                                                                                                              | iiris.hovatta@helsinki.fi          | <a href="#">Clinical Groups</a> | Depression group                 |
| Chia-Yen Chen              | Biogen, Cambridge, MA, United States                                                                                                                                                                         | chiayen.chen@biogen.com            | <a href="#">Clinical Groups</a> | Depression group                 |
| Erkki Isometsä             | Hospital District of Helsinki and Uusimaa, Helsinki, Finland                                                                                                                                                 | erkki.isometsa@hus.fi              | <a href="#">Clinical Groups</a> | Depression group                 |
| Hanna Ollila               | Institute for Molecular Medicine Finland (FIMM), HiLIFE, University of Helsinki, Helsinki, Finland                                                                                                           | hanna.m.ollila@helsinki.fi         | <a href="#">Clinical Groups</a> | Depression group                 |
| Jaana Suvisaari            | Finnish Institute for Health and Welfare (THL), Helsinki, Finland                                                                                                                                            | jaana.suvisaari@thl.fi             | <a href="#">Clinical Groups</a> | Depression group                 |
| Antti Mäkitie              | Department of Otorhinolaryngology - Head and Neck Surgery, University of Helsinki and Helsinki University Hospital, Helsinki, Finland                                                                        | antti.makitie@helsinki.fi          | <a href="#">Clinical Groups</a> | ENT (ear, nose and throat) Group |
| Argyro Bizaki-Vallaskangas | Pirkanmaa Hospital District, Tampere, Finland                                                                                                                                                                | argyro.bizaki-vallaskangas@tuni.fi | <a href="#">Clinical Groups</a> | ENT (ear, nose and throat) Group |
| Sanna Toppila-Salmi        | University of Eastern Finland and Kuopio University Hospital, Department of Otorhinolaryngology, Kuopio, Finland and Department of Allergy, Helsinki University Hospital and University of Helsinki, Finland | sanna.salmi@helsinki.fi            | <a href="#">Clinical Groups</a> | ENT (ear, nose and throat) Group |
| Tytti Willberg             | Hospital District of Southwest Finland, Turku, Finland                                                                                                                                                       | tytti.willberg@tyks.fi             | <a href="#">Clinical Groups</a> | ENT (ear, nose and throat) Group |
| Elmo Saarentaus            | Institute for Molecular Medicine Finland (FIMM), HiLIFE, University of Helsinki, Helsinki, Finland                                                                                                           | elmo.saarentaus@helsinki.fi        | <a href="#">Clinical Groups</a> | ENT (ear, nose and throat) Group |
| Antti Aarnisalo            | Hospital District of Helsinki and Uusimaa, Helsinki, Finland                                                                                                                                                 | antti.aarnisalo@hus.fi             | <a href="#">Clinical Groups</a> | ENT (ear, nose and throat) Group |
| Eveliina Salminen          | Hospital District of Helsinki and Uusimaa, Helsinki, Finland                                                                                                                                                 | eveliina.e.salminen@hus.fi         | <a href="#">Clinical Groups</a> | ENT (ear, nose and throat) Group |
| Elisa Rahikkala            | Northern Ostrobothnia Hospital District, Oulu, Finland                                                                                                                                                       | elisa.rahikkala@ppshp.fi           | <a href="#">Clinical Groups</a> | ENT (ear, nose and throat) Group |



|                     |                                                                                                                                                                         |                                 |                                       |                                              |
|---------------------|-------------------------------------------------------------------------------------------------------------------------------------------------------------------------|---------------------------------|---------------------------------------|----------------------------------------------|
| Johannes Kettunen   | Northern Ostrobothnia Hospital District, Oulu, Finland                                                                                                                  | johannes.kettunen@oulu.fi       | <b>Clinical Groups</b>                | <b>ENT (ear, nose and throat) Group</b>      |
| Kristiina Aittomäki | Department of Medical Genetics, Helsinki University Central Hospital, Helsinki, Finland                                                                                 | kristiina.aittomaki@helsinki.fi | <b>Clinical Groups</b>                | <b>POI (premature ovarian failure) Group</b> |
| Fredrik Åberg       | Transplantation and Liver Surgery Clinic, Helsinki University Hospital, Helsinki University, Helsinki, Finland                                                          | fredrik.aberg@helsinki.fi       | <b>Clinical Groups</b>                | <b>LiverScore Group</b>                      |
| Mitja Kurki         | Institute for Molecular Medicine Finland (FIMM), HiLIFE, University of Helsinki, Helsinki, Finland; Broad Institute, Cambridge, MA, United States                       | mkurki@broadinstitute.org       | <b>FinnGen Analysis working group</b> | <b>FinnGen Analysis working group</b>        |
| Samuli Ripatti      | Institute for Molecular Medicine Finland (FIMM), HiLIFE, University of Helsinki, Helsinki, Finland                                                                      | samuli.ripatti@helsinki.fi      | <b>FinnGen Analysis working group</b> | <b>FinnGen Analysis working group</b>        |
| Mark Daly           | Institute for Molecular Medicine, Finland (FIMM), HiLIFE, University of Helsinki, Helsinki, Finland; Broad Institute of MIT and Harvard; Massachusetts General Hospital | mark.daly@helsinki.fi           | <b>FinnGen Analysis working group</b> | <b>FinnGen Analysis working group</b>        |
| Juha Karjalainen    | Institute for Molecular Medicine Finland (FIMM), HiLIFE, University of Helsinki, Helsinki, Finland                                                                      | juha.karjalainen@helsinki.fi    | <b>FinnGen Analysis working group</b> | <b>FinnGen Analysis working group</b>        |
| Aki Havulinna       | Institute for Molecular Medicine Finland (FIMM), HiLIFE, University of Helsinki, Helsinki, Finland; Finnish Institute for Health and Welfare (THL), Helsinki, Finland   | aki.havulinna@helsinki.fi       | <b>FinnGen Analysis working group</b> | <b>FinnGen Analysis working group</b>        |
| Juha Mehtonen       | Institute for Molecular Medicine Finland (FIMM), HiLIFE, University of Helsinki, Helsinki, Finland                                                                      | juha.mehtonen@helsinki.fi       | <b>FinnGen Analysis working group</b> | <b>FinnGen Analysis working group</b>        |
| Priit Palta         | Institute for Molecular Medicine Finland (FIMM), HiLIFE, University of Helsinki, Helsinki, Finland                                                                      | priit.palta@helsinki.fi         | <b>FinnGen Analysis working group</b> | <b>FinnGen Analysis working group</b>        |
| Shabbeer Hassan     | Institute for Molecular Medicine Finland (FIMM), HiLIFE, University of Helsinki, Helsinki, Finland                                                                      | shabbeer.hassan@helsinki.fi     | <b>FinnGen Analysis working group</b> | <b>FinnGen Analysis working group</b>        |

|                             |                                                                                                    |                                       |                                                |                                                |
|-----------------------------|----------------------------------------------------------------------------------------------------|---------------------------------------|------------------------------------------------|------------------------------------------------|
| Pietro Della Briotta Parolo | Institute for Molecular Medicine Finland (FIMM), HiLIFE, University of Helsinki, Helsinki, Finland | pietro.dellabriottaparolo@helsinki.fi | <a href="#">FinnGen Analysis working group</a> | <a href="#">FinnGen Analysis working group</a> |
| Wei Zhou                    | Broad Institute, Cambridge, MA, United States                                                      | wzhou@broadinstitute.org              | <a href="#">FinnGen Analysis working group</a> | <a href="#">FinnGen Analysis working group</a> |
| Mutaamba Maasha             | Broad Institute, Cambridge, MA, United States                                                      | mmaasha@broadinstitute.org            | <a href="#">FinnGen Analysis working group</a> | <a href="#">FinnGen Analysis working group</a> |
| Shabbeer Hassan             | Institute for Molecular Medicine Finland (FIMM), HiLIFE, University of Helsinki, Helsinki, Finland | shabbeer.hasan@helsinki.fi            | <a href="#">FinnGen Analysis working group</a> | <a href="#">FinnGen Analysis working group</a> |
| Susanna Lemmelä             | Institute for Molecular Medicine Finland (FIMM), HiLIFE, University of Helsinki, Helsinki, Finland | susanna.lemmela@helsinki.fi           | <a href="#">FinnGen Analysis working group</a> | <a href="#">FinnGen Analysis working group</a> |
| Manuel Rivas                | University of Stanford, Stanford, CA, United States                                                | mrivas@stanford.edu                   | <a href="#">FinnGen Analysis working group</a> | <a href="#">FinnGen Analysis working group</a> |
| Aarno Palotie               | Institute for Molecular Medicine Finland (FIMM), HiLIFE, University of Helsinki, Helsinki, Finland | aarno.palotie@helsinki.fi             | <a href="#">FinnGen Analysis working group</a> | <a href="#">FinnGen Analysis working group</a> |
| Aoxing Liu                  | Institute for Molecular Medicine Finland (FIMM), HiLIFE, University of Helsinki, Helsinki, Finland | aoxing.liu@helsinki.fi                | <a href="#">FinnGen Analysis working group</a> | <a href="#">FinnGen Analysis working group</a> |
| Arto Lehisto                | Institute for Molecular Medicine Finland (FIMM), HiLIFE, University of Helsinki, Helsinki, Finland | arto.lehisto@helsinki.fi              | <a href="#">FinnGen Analysis working group</a> | <a href="#">FinnGen Analysis working group</a> |
| Andrea Ganna                | Institute for Molecular Medicine Finland (FIMM), HiLIFE, University of Helsinki, Helsinki, Finland | aganna@broadinstitute.org             | <a href="#">FinnGen Analysis working group</a> | <a href="#">FinnGen Analysis working group</a> |
| Vincent Llorens             | Institute for Molecular Medicine Finland (FIMM), HiLIFE, University of Helsinki, Helsinki, Finland | vincent.llorenses@helsinki.fi         | <a href="#">FinnGen Analysis working group</a> | <a href="#">FinnGen Analysis working group</a> |

|                  |                                                                                                       |                              |                                                |                                                |
|------------------|-------------------------------------------------------------------------------------------------------|------------------------------|------------------------------------------------|------------------------------------------------|
| Hannele Laivuori | Institute for Molecular Medicine Finland (FIMM),<br>HiLIFE, University of Helsinki, Helsinki, Finland | hannele.laivuori@helsinki.fi | <a href="#">FinnGen Analysis working group</a> | <a href="#">FinnGen Analysis working group</a> |
| Taru Tukiainen   | Institute for Molecular Medicine Finland (FIMM),<br>HiLIFE, University of Helsinki, Helsinki, Finland | taru.tukiainen@helsinki.fi   | <a href="#">FinnGen Analysis working group</a> | <a href="#">FinnGen Analysis working group</a> |
| Mary Pat Reeve   | Institute for Molecular Medicine Finland (FIMM),<br>HiLIFE, University of Helsinki, Helsinki, Finland | mary.reeve@helsinki.fi       | <a href="#">FinnGen Analysis working group</a> | <a href="#">FinnGen Analysis working group</a> |
| Henrike Heyne    | Institute for Molecular Medicine Finland (FIMM),<br>HiLIFE, University of Helsinki, Helsinki, Finland | hheyne@broadoinstitute.org   | <a href="#">FinnGen Analysis working group</a> | <a href="#">FinnGen Analysis working group</a> |
| Nina Mars        | Institute for Molecular Medicine Finland (FIMM),<br>HiLIFE, University of Helsinki, Helsinki, Finland | nina.mars@helsinki.fi        | <a href="#">FinnGen Analysis working group</a> | <a href="#">FinnGen Analysis working group</a> |
| Joel Rämö        | Institute for Molecular Medicine Finland (FIMM),<br>HiLIFE, University of Helsinki, Helsinki, Finland | joel.ramo@helsinki.fi        | <a href="#">FinnGen Analysis working group</a> | <a href="#">FinnGen Analysis working group</a> |
| Elmo Saarentaus  | Institute for Molecular Medicine Finland (FIMM),<br>HiLIFE, University of Helsinki, Helsinki, Finland | elmo.saarentaus@helsinki.fi  | <a href="#">FinnGen Analysis working group</a> | <a href="#">FinnGen Analysis working group</a> |
| Hanna Ollila     | Institute for Molecular Medicine Finland (FIMM),<br>HiLIFE, University of Helsinki, Helsinki, Finland | hanna.m.ollila@helsinki.fi   | <a href="#">FinnGen Analysis working group</a> | <a href="#">FinnGen Analysis working group</a> |
| Satu Strausz     | Institute for Molecular Medicine Finland (FIMM),<br>HiLIFE, University of Helsinki, Helsinki, Finland | satu.strausz@helsinki.fi     | <a href="#">FinnGen Analysis working group</a> | <a href="#">FinnGen Analysis working group</a> |
| Tuula Palotie    | University of Helsinki and Hospital District of Helsinki and Uusimaa, Helsinki, Finland               | tuula.palotie@helsinki.fi    | <a href="#">FinnGen Analysis working group</a> | <a href="#">FinnGen Analysis working group</a> |
| Kimmo Palin      | University of Helsinki, Helsinki, Finland                                                             | kimmo.palin@helsinki.fi      | <a href="#">FinnGen Analysis working group</a> | <a href="#">FinnGen Analysis working group</a> |

|                       |                                                                                                                                                                                             |                               |                                                |                                                |
|-----------------------|---------------------------------------------------------------------------------------------------------------------------------------------------------------------------------------------|-------------------------------|------------------------------------------------|------------------------------------------------|
| Javier Garcia-Tabuena | University of Tampere, Tampere, Finland                                                                                                                                                     | javier.graciatabuena@utu.fi   | <a href="#">FinnGen Analysis working group</a> | <a href="#">FinnGen Analysis working group</a> |
| Harri Siirtola        | University of Tampere, Tampere, Finland                                                                                                                                                     | harri.siirtola@tuni.fi        | <a href="#">FinnGen Analysis working group</a> | <a href="#">FinnGen Analysis working group</a> |
| Tuomo Kiiskinen       | Institute for Molecular Medicine Finland (FIMM), HiLIFE, University of Helsinki, Helsinki, Finland                                                                                          | tuomo.kiiskinen@helsinki.fi   | <a href="#">FinnGen Analysis working group</a> | <a href="#">FinnGen Analysis working group</a> |
| Jiwoo Lee             | Institute for Molecular Medicine Finland (FIMM), HiLIFE, University of Helsinki, Helsinki, Finland; Broad Institute, Cambridge, MA, United States                                           | jiwoo.lee@helsinki.fi         | <a href="#">FinnGen Analysis working group</a> | <a href="#">FinnGen Analysis working group</a> |
| Kristin Tsuo          | Institute for Molecular Medicine Finland (FIMM), HiLIFE, University of Helsinki, Helsinki, Finland; Broad Institute, Cambridge, MA, United States                                           | kristintsuo@fas.harvard.edu   | <a href="#">FinnGen Analysis working group</a> | <a href="#">FinnGen Analysis working group</a> |
| Amanda Elliott        | Institute for Molecular Medicine Finland (FIMM), HiLIFE, University of Helsinki, Helsinki, Finland; Broad Institute, Cambridge, MA, USA and Massachusetts General Hospital, Boston, MA, USA | aelliott@broadinstitute.org   | <a href="#">FinnGen Analysis working group</a> | <a href="#">FinnGen Analysis working group</a> |
| Kati Kristiansson     | THL Biobank / Finnish Institute for Health and Welfare (THL), Helsinki, Finland                                                                                                             | kati.kristiansson@thl.fi      | <a href="#">FinnGen Analysis working group</a> | <a href="#">FinnGen Analysis working group</a> |
| Mikko Arvas           | Finnish Red Cross Blood Service / Finnish Hematology Registry and Clinical Biobank, Helsinki, Finland                                                                                       | mikko.arvas@veripalvelu.fi    | <a href="#">FinnGen Analysis working group</a> | <a href="#">FinnGen Analysis working group</a> |
| Kati Hyvärinen        | Finnish Red Cross Blood Service, Helsinki, Finland                                                                                                                                          | kati.hyvarinen@veripalvelu.fi | <a href="#">FinnGen Analysis working group</a> | <a href="#">FinnGen Analysis working group</a> |
| Jarmo Ritari          | Finnish Red Cross Blood Service, Helsinki, Finland                                                                                                                                          | jarmo.ritari@veripalvelu.fi   | <a href="#">FinnGen Analysis working group</a> | <a href="#">FinnGen Analysis working group</a> |
| Olli Carpen           | Helsinki Biobank / Helsinki University and Hospital District of Helsinki and Uusimaa, Helsinki                                                                                              | olli.carpen@helsinki.fi       | <a href="#">FinnGen Analysis working group</a> | <a href="#">FinnGen Analysis working group</a> |

|                   |                                                                                                                 |                             |                                                |                                                |
|-------------------|-----------------------------------------------------------------------------------------------------------------|-----------------------------|------------------------------------------------|------------------------------------------------|
| Johannes Kettunen | Northern Finland Biobank Borealis / University of Oulu / Northern Ostrobothnia Hospital District, Oulu, Finland | johannes.kettunen@oulu.fi   | <a href="#">FinnGen Analysis working group</a> | <a href="#">FinnGen Analysis working group</a> |
| Katri Pylkäs      | University of Oulu, Oulu, Finland                                                                               | katri.pylkas@oulu.fi        | <a href="#">FinnGen Analysis working group</a> | <a href="#">FinnGen Analysis working group</a> |
| Eeva Sliz         | University of Oulu, Oulu, Finland                                                                               | eeva.sliz@oulu.fi           | <a href="#">FinnGen Analysis working group</a> | <a href="#">FinnGen Analysis working group</a> |
| Minna Karjalainen | University of Oulu, Oulu, Finland                                                                               | minna.k.karjalainen@oulu.fi | <a href="#">FinnGen Analysis working group</a> | <a href="#">FinnGen Analysis working group</a> |
| Tuomo Mantere     | Northern Finland Biobank Borealis / University of Oulu / Northern Ostrobothnia Hospital District, Oulu, Finland | tuomo.mantere@oulu.fi       | <a href="#">FinnGen Analysis working group</a> | <a href="#">FinnGen Analysis working group</a> |
| Eeva Kangasniemi  | Finnish Clinical Biobank Tampere / University of Tampere / Pirkanmaa Hospital District, Tampere, Finland        | eeva.kangasniemi@pshp.fi    | <a href="#">FinnGen Analysis working group</a> | <a href="#">FinnGen Analysis working group</a> |
| Sami Heikkinen    | University of Eastern Finland, Kuopio, Finland                                                                  | sami.heikkinen@uef.fi       | <a href="#">FinnGen Analysis working group</a> | <a href="#">FinnGen Analysis working group</a> |
| Arto Mannermaa    | Biobank of Eastern Finland / University of Eastern Finland / Northern Savo Hospital District, Kuopio, Finland   | arto.mannermaa@uef.fi       | <a href="#">FinnGen Analysis working group</a> | <a href="#">FinnGen Analysis working group</a> |
| Eija Laakkonen    | University of Jyväskylä, Jyväskylä, Finland                                                                     | eija.k.laakkonen@jyu.fi     | <a href="#">FinnGen Analysis working group</a> | <a href="#">FinnGen Analysis working group</a> |
| Nina Pitkänen     | Auria Biobank / University of Turku / Hospital District of Southwest Finland, Turku, Finland                    | Niina.Pitkane@tyks.fi       | <a href="#">FinnGen Analysis working group</a> | <a href="#">FinnGen Analysis working group</a> |
| Samuel Lessard    | Translational Sciences, Sanofi R&D, Framingham, MA, USA                                                         | samuel.lessard@sanofi.com   | <a href="#">FinnGen Analysis working group</a> | <a href="#">FinnGen Analysis working group</a> |

|                    |                                                                                                                 |                                |                                                |                                                |
|--------------------|-----------------------------------------------------------------------------------------------------------------|--------------------------------|------------------------------------------------|------------------------------------------------|
| Clément Chatelain  | Translational Sciences, Sanofi R&D, Framingham, MA, USA                                                         | clement.chatelain@sanofi.com   | <a href="#">FinnGen Analysis working group</a> | <a href="#">FinnGen Analysis working group</a> |
| Lila Kallio        | Auria Biobank / University of Turku / Hospital District of Southwest Finland, Turku, Finland                    | Lila.Kallio@tyks.fi            | <a href="#">Biobank directors</a>              | <a href="#">Biobank directors</a>              |
| Tiina Wahlfors     | THL Biobank / Finnish Institute for Health and Welfare (THL), Helsinki, Finland                                 | tiina.wahlfors@thl.fi          | <a href="#">Biobank directors</a>              | <a href="#">Biobank directors</a>              |
| Jukka Partanen     | Finnish Red Cross Blood Service / Finnish Hematology Registry and Clinical Biobank, Helsinki, Finland           | jukka.partanen@veripalvelu.fi  | <a href="#">Biobank directors</a>              | <a href="#">Biobank directors</a>              |
| Eero Punkka        | Helsinki Biobank / Helsinki University and Hospital District of Helsinki and Uusimaa, Helsinki                  | eero.punkka@hus.fi             | <a href="#">Biobank directors</a>              | <a href="#">Biobank directors</a>              |
| Raisa Serpi        | Northern Finland Biobank Borealis / University of Oulu / Northern Ostrobothnia Hospital District, Oulu, Finland | raisa.serpi@ppshp.fi           | <a href="#">Biobank directors</a>              | <a href="#">Biobank directors</a>              |
| Sanna Siltanen     | Finnish Clinical Biobank Tampere / University of Tampere / Pirkanmaa Hospital District, Tampere, Finland        | sanna.siltanen@pirha.fi        | <a href="#">Biobank directors</a>              | <a href="#">Biobank directors</a>              |
| Veli-Matti Kosma   | Biobank of Eastern Finland / University of Eastern Finland / Northern Savo Hospital District, Kuopio, Finland   | veli-matti.kosma@uef.fi        | <a href="#">Biobank directors</a>              | <a href="#">Biobank directors</a>              |
| Tiina Jokela       | Central Finland Biobank / University of Jyväskylä / Central Finland Health Care District, Jyväskylä, Finland    | tiina.a.jokela@jyu.fi          | <a href="#">Biobank directors</a>              | <a href="#">Biobank directors</a>              |
| Anu Jalanko        | Institute for Molecular Medicine Finland (FIMM), HiLIFE, University of Helsinki, Helsinki, Finland              | anu.jalanko@helsinki.fi        | <a href="#">FinnGen Teams</a>                  | <b>Administration</b>                          |
| Auli Toivola       | Institute for Molecular Medicine Finland (FIMM), HiLIFE, University of Helsinki, Helsinki, Finland              | auli.toivola@helsinki.fi       | <a href="#">FinnGen Teams</a>                  | <b>Administration</b>                          |
| Huei-Yi Shen       | Institute for Molecular Medicine Finland (FIMM), HiLIFE, University of Helsinki, Helsinki, Finland              | huei-yi.shen@helsinki.fi       | <a href="#">FinnGen Teams</a>                  | <b>Administration</b>                          |
| Risto Kajanne      | Institute for Molecular Medicine Finland (FIMM), HiLIFE, University of Helsinki, Helsinki, Finland              | risto.kajanne@helsinki.fi      | <a href="#">FinnGen Teams</a>                  | <b>Administration</b>                          |
| Rodos Rodosthenous | Institute for Molecular Medicine Finland (FIMM), HiLIFE, University of Helsinki, Helsinki, Finland              | rodos.rodosthenous@helsinki.fi | <a href="#">FinnGen Teams</a>                  | <b>Administration</b>                          |
| Mervi Aavikko      | Institute for Molecular Medicine Finland (FIMM), HiLIFE, University of Helsinki, Helsinki, Finland              | mervi.aavikko@helsinki.fi      | <a href="#">FinnGen Teams</a>                  | <b>Administration</b>                          |
| Helen Cooper       | Institute for Molecular Medicine Finland (FIMM), HiLIFE, University of Helsinki, Helsinki, Finland              | helen.cooper@helsinki.fi       | <a href="#">FinnGen Teams</a>                  | <b>Administration</b>                          |

|                             |                                                                                                                                                                                             |                                       |                               |                               |
|-----------------------------|---------------------------------------------------------------------------------------------------------------------------------------------------------------------------------------------|---------------------------------------|-------------------------------|-------------------------------|
| Denise Öller                | Institute for Molecular Medicine Finland (FIMM), HiLIFE, University of Helsinki, Helsinki, Finland                                                                                          | denise.oller@helsinki.fi              | <a href="#">FinnGen Teams</a> | Administration                |
| Tarja Laitinen              | Institute for Molecular Medicine Finland (FIMM), HiLIFE, University of Helsinki, Helsinki, Finland                                                                                          | tarja.laitinen@helsinki.fi            | <a href="#">FinnGen Teams</a> | Administration                |
| Rasko Leinonen              | Institute for Molecular Medicine Finland (FIMM), HiLIFE, University of Helsinki, Helsinki, Finland; European Molecular Biology Laboratory, European Bioinformatics Institute, Cambridge, UK | rasko@ebi.ac.uk                       | <a href="#">FinnGen Teams</a> | Administration                |
| Henna Palin                 | Finnish Clinical Biobank Tampere / University of Tampere / Pirkanmaa Hospital District, Tampere, Finland                                                                                    | henna.palin@pshp.fi                   | <a href="#">FinnGen Teams</a> | Administration                |
| Malla-Maria Linna           | Helsinki Biobank / Helsinki University and Hospital District of Helsinki and Uusimaa, Helsinki                                                                                              | malla-maria.linna@hus.fi              | <a href="#">FinnGen Teams</a> | Administration                |
| Mitja Kurki                 | Institute for Molecular Medicine Finland (FIMM), HiLIFE, University of Helsinki, Helsinki, Finland; Broad Institute, Cambridge, MA, United States                                           | mkurki@broadinstitute.org             | <a href="#">FinnGen Teams</a> | Analysis                      |
| Juha Karjalainen            | Institute for Molecular Medicine Finland (FIMM), HiLIFE, University of Helsinki, Helsinki, Finland                                                                                          | juha.karjalainen@helsinki.fi          | <a href="#">FinnGen Teams</a> | Analysis                      |
| Pietro Della Briotta Parolo | Institute for Molecular Medicine Finland (FIMM), HiLIFE, University of Helsinki, Helsinki, Finland                                                                                          | pietro.dellabriottaparolo@helsinki.fi | <a href="#">FinnGen Teams</a> | Analysis                      |
| Arto Lehisto                | Institute for Molecular Medicine Finland (FIMM), HiLIFE, University of Helsinki, Helsinki, Finland                                                                                          | arto.lehisto@helsinki.fi              | <a href="#">FinnGen Teams</a> | Analysis                      |
| Juha Mehtonen               | Institute for Molecular Medicine Finland (FIMM), HiLIFE, University of Helsinki, Helsinki, Finland                                                                                          | juha.mehtonen@helsinki.fi             | <a href="#">FinnGen Teams</a> | Analysis                      |
| Wei Zhou                    | Broad Institute, Cambridge, MA, United States                                                                                                                                               | wzhou@broadinstitute.org              | <a href="#">FinnGen Teams</a> | Analysis                      |
| Masahiro Kanai              | Broad Institute, Cambridge, MA, United States                                                                                                                                               | mkanai@broadinstitute.org             | <a href="#">FinnGen Teams</a> | Analysis                      |
| Mutaamba Maasha             | Broad Institute, Cambridge, MA, United States                                                                                                                                               | mmaasha@broadinstitute.org            | <a href="#">FinnGen Teams</a> | Analysis                      |
| Zhili Zheng                 | Broad Institute, Cambridge, MA, United States                                                                                                                                               | zhengzhi@broadinstitute.org           | <a href="#">FinnGen Teams</a> | Analysis                      |
| Hannele Laivuori            | Institute for Molecular Medicine Finland (FIMM), HiLIFE, University of Helsinki, Helsinki, Finland                                                                                          | hannele.laivuori@helsinki.fi          | <a href="#">FinnGen Teams</a> | Clinical Endpoint Development |

|                          |                                                                                                                                                                                |                                 |                                                  |                                     |
|--------------------------|--------------------------------------------------------------------------------------------------------------------------------------------------------------------------------|---------------------------------|--------------------------------------------------|-------------------------------------|
| Aki Havulinna            | Institute for Molecular Medicine Finland (FIMM),<br>HiLIFE, University of Helsinki, Helsinki, Finland;<br>Finnish Institute for Health and Welfare (THL),<br>Helsinki, Finland | aki.havulinna@helsinki.fi       | <a href="#">FinnGen</a><br><a href="#">Teams</a> | Clinical<br>Endpoint<br>Development |
| Susanna Lemmelä          | Institute for Molecular Medicine Finland (FIMM),<br>HiLIFE, University of Helsinki, Helsinki, Finland                                                                          | susanna.lemmela@helsinki.fi     | <a href="#">FinnGen</a><br><a href="#">Teams</a> | Clinical<br>Endpoint<br>Development |
| Tuomo Kiiskinen          | Institute for Molecular Medicine Finland (FIMM),<br>HiLIFE, University of Helsinki, Helsinki, Finland                                                                          | tuomo.kiiskinen@helsinki.fi     | <a href="#">FinnGen</a><br><a href="#">Teams</a> | Clinical<br>Endpoint<br>Development |
| L. Elisa Lahtela         | Institute for Molecular Medicine Finland (FIMM),<br>HiLIFE, University of Helsinki, Helsinki, Finland                                                                          | laura.lahtela@helsinki.fi       | <a href="#">FinnGen</a><br><a href="#">Teams</a> | Clinical<br>Endpoint<br>Development |
| Mari Kaunisto            | Institute for Molecular Medicine Finland (FIMM),<br>HiLIFE, University of Helsinki, Helsinki, Finland                                                                          | mari.kaunisto@helsinki.fi       | <a href="#">FinnGen</a><br><a href="#">Teams</a> | Communication                       |
| Elina Kilpeläinen        | Institute for Molecular Medicine Finland (FIMM),<br>HiLIFE, University of Helsinki, Helsinki, Finland                                                                          | elina.kilpelainen@helsinki.fi   | <a href="#">FinnGen</a><br><a href="#">Teams</a> | E-Science                           |
| Tianduanyi Wang          | Institute for Molecular Medicine Finland (FIMM),<br>HiLIFE, University of Helsinki, Helsinki, Finland                                                                          | tianduanyi.wang@helsinki.fi     | <a href="#">FinnGen</a><br><a href="#">Teams</a> | E-Science                           |
| Timo P. Sipilä           | Institute for Molecular Medicine Finland (FIMM),<br>HiLIFE, University of Helsinki, Helsinki, Finland                                                                          | timo.p.sipila@helsinki.fi       | <a href="#">FinnGen</a><br><a href="#">Teams</a> | E-Science                           |
| Oluwaseun Alexander Dada | Institute for Molecular Medicine Finland (FIMM),<br>HiLIFE, University of Helsinki, Helsinki, Finland                                                                          | alexander.dada@helsinki.fi      | <a href="#">FinnGen</a><br><a href="#">Teams</a> | E-Science                           |
| Awaisa Ghazal            | Institute for Molecular Medicine Finland (FIMM),<br>HiLIFE, University of Helsinki, Helsinki, Finland                                                                          | awaisa.ghazal@helsinki.fi       | <a href="#">FinnGen</a><br><a href="#">Teams</a> | E-Science                           |
| Anastasia Kytölä         | Institute for Molecular Medicine Finland (FIMM),<br>HiLIFE, University of Helsinki, Helsinki, Finland                                                                          | anastasia.shcherban@helsinki.fi | <a href="#">FinnGen</a><br><a href="#">Teams</a> | E-Science                           |
| Rigbe Weldatsadik        | Institute for Molecular Medicine Finland (FIMM),<br>HiLIFE, University of Helsinki, Helsinki, Finland                                                                          | rigbe.weldatsadik@helsinki.fi   | <a href="#">FinnGen</a><br><a href="#">Teams</a> | E-Science                           |
| Sanni Ruotsalainen       | Institute for Molecular Medicine Finland (FIMM),<br>HiLIFE, University of Helsinki, Helsinki, Finland                                                                          | sanni.ruotsalainen@helsinki.fi  | <a href="#">FinnGen</a><br><a href="#">Teams</a> | E-Science                           |



|                  |                                                                                                       |                              |                               |                                      |
|------------------|-------------------------------------------------------------------------------------------------------|------------------------------|-------------------------------|--------------------------------------|
| Jaska Uimonen    | Institute for Molecular Medicine Finland (FIMM),<br>HiLIFE, University of Helsinki, Helsinki, Finland | jaska.uimonen@helsinki.fi    | <a href="#">FinnGen Teams</a> | E-Science                            |
| Kati Donner      | Institute for Molecular Medicine Finland (FIMM),<br>HiLIFE, University of Helsinki, Helsinki, Finland | kati.donner@helsinki.fi      | <a href="#">FinnGen Teams</a> | Genotyping                           |
| Anu Loukola      | Helsinki Biobank / Helsinki University and Hospital<br>District of Helsinki and Uusimaa, Helsinki     | anu.loukola@hus.fi           | <a href="#">FinnGen Teams</a> | Sample<br>Collection<br>Coordination |
| Päivi Laiho      | THL Biobank / Finnish Institute for Health and Welfare<br>(THL), Helsinki, Finland                    | paivi.laiho@thl.fi           | <a href="#">FinnGen Teams</a> | Sample<br>Logistics                  |
| Tuuli Sistonen   | THL Biobank / Finnish Institute for Health and Welfare<br>(THL), Helsinki, Finland                    | tuuli.sistonen@thl.fi        | <a href="#">FinnGen Teams</a> | Sample<br>Logistics                  |
| Essi Kaiharju    | THL Biobank / Finnish Institute for Health and Welfare<br>(THL), Helsinki, Finland                    | essi.kaiharju@thl.fi         | <a href="#">FinnGen Teams</a> | Sample<br>Logistics                  |
| Markku Laukkanen | THL Biobank / Finnish Institute for Health and Welfare<br>(THL), Helsinki, Finland                    | markku.laukkanen@thl.fi      | <a href="#">FinnGen Teams</a> | Sample<br>Logistics                  |
| Elina Järvensivu | THL Biobank / Finnish Institute for Health and Welfare<br>(THL), Helsinki, Finland                    | elina.jarvensivu@thl.fi      | <a href="#">FinnGen Teams</a> | Sample<br>Logistics                  |
| Sini Lähteenmäki | THL Biobank / Finnish Institute for Health and Welfare<br>(THL), Helsinki, Finland                    | sini.lahteenmaki@thl.fi      | <a href="#">FinnGen Teams</a> | Sample<br>Logistics                  |
| Lotta Männikkö   | THL Biobank / Finnish Institute for Health and Welfare<br>(THL), Helsinki, Finland                    | lotta.mannikko@thl.fi        | <a href="#">FinnGen Teams</a> | Sample<br>Logistics                  |
| Regis Wong       | THL Biobank / Finnish Institute for Health and Welfare<br>(THL), Helsinki, Finland                    | regis.wong@thl.fi            | <a href="#">FinnGen Teams</a> | Sample<br>Logistics                  |
| Auli Toivola     | THL Biobank / Finnish Institute for Health and Welfare<br>(THL), Helsinki, Finland                    | auli.toivola@thl.fi          | <a href="#">FinnGen Teams</a> | Sample<br>Logistics                  |
| Minna Brunfeldt  | THL Biobank / Finnish Institute for Health and Welfare<br>(THL), Helsinki, Finland                    | minna.brunfeldt@thl.fi       | <a href="#">FinnGen Teams</a> | Registry<br>Data<br>Operations       |
| Susanna Lemmelä  | Institute for Molecular Medicine Finland (FIMM),<br>HiLIFE, University of Helsinki, Helsinki, Finland | susanna.lemmelä@helsinki.fi  | <a href="#">FinnGen Teams</a> | Registry<br>Data<br>Operations       |
| Sami Koskelainen | THL Biobank / Finnish Institute for Health and Welfare<br>(THL), Helsinki, Finland                    | sami.koskelainen@thl.fi      | <a href="#">FinnGen Teams</a> | Registry<br>Data<br>Operations       |
| Tero Hiekkalinna | THL Biobank / Finnish Institute for Health and Welfare<br>(THL), Helsinki, Finland                    | tero.hiekkalinna@helsinki.fi | <a href="#">FinnGen Teams</a> | Registry<br>Data<br>Operations       |
| Teemu Paajanen   | THL Biobank / Finnish Institute for Health and Welfare<br>(THL), Helsinki, Finland                    | teemu.paajanen@thl.fi        | <a href="#">FinnGen Teams</a> | Registry<br>Data                     |

|                               |                                                                                                       |                               |                               | Operations                          |
|-------------------------------|-------------------------------------------------------------------------------------------------------|-------------------------------|-------------------------------|-------------------------------------|
| Priit Palta                   | Institute for Molecular Medicine Finland (FIMM),<br>HiLIFE, University of Helsinki, Helsinki, Finland | priit.palta@helsinki.fi       | <a href="#">FinnGen Teams</a> | Sequencing Informatics              |
| Shuang Luo                    | Institute for Molecular Medicine Finland (FIMM),<br>HiLIFE, University of Helsinki, Helsinki, Finland | shuang.luo@helsinki.fi        | <a href="#">FinnGen Teams</a> | Sequencing Informatics              |
| Mary Pat Reeve                | Institute for Molecular Medicine Finland (FIMM),<br>HiLIFE, University of Helsinki, Helsinki, Finland | mary.reeve@helsinki.fi        | <a href="#">FinnGen Teams</a> | Trajectory                          |
| Shanmukha Sampath Padmanabhan | Institute for Molecular Medicine Finland (FIMM),<br>HiLIFE, University of Helsinki, Helsinki, Finland | sam.padmanabhan@helsinki.fi   | <a href="#">FinnGen Teams</a> | Trajectory                          |
| Marianna Niemi                | University of Tampere, Tampere, Finland                                                               | marianna.niemmi@tuni.fi       | <a href="#">FinnGen Teams</a> | Trajectory                          |
| Harri Siirtola                | University of Tampere, Tampere, Finland                                                               | harri.siirtola@tuni.fi        | <a href="#">FinnGen Teams</a> | Trajectory                          |
| Javier Gracia-Tabuenca        | University of Tampere, Tampere, Finland                                                               | javier.graciatabuena@tuni.fi  | <a href="#">FinnGen Teams</a> | Trajectory                          |
| Mika Helminen                 | University of Tampere, Tampere, Finland                                                               | mika.helminen@tuni.fi         | <a href="#">FinnGen Teams</a> | Trajectory                          |
| Tiina Luukkaala               | University of Tampere, Tampere, Finland                                                               | tiina.luukkaala@tuni.fi       | <a href="#">FinnGen Teams</a> | Trajectory                          |
| Iida Vähätalo                 | University of Tampere, Tampere, Finland                                                               | iida.vahatalo@epshp.fi        | <a href="#">FinnGen Teams</a> | Trajectory                          |
| Iina Laak                     | Institute for Molecular Medicine Finland (FIMM),<br>HiLIFE, University of Helsinki, Helsinki, Finland | iina.laak@helsinki.fi         | <a href="#">FinnGen Teams</a> | Data protection officer             |
| Marco Hautalahti              | Finnish Biobank Cooperative - FINBB                                                                   | marco.hautalahti@finbb.fi     | <a href="#">FinnGen Teams</a> | FINBB - Finnish biobank cooperative |
| Johanna Mäkelä                | Finnish Biobank Cooperative - FINBB                                                                   | johanna.makela@finbb.fi       | <a href="#">FinnGen Teams</a> | FINBB - Finnish biobank cooperative |
| Saija Haapa-Paananen          | Finnish Biobank Cooperative - FINBB                                                                   | saija.haapa-paananen@finbb.fi | <a href="#">FinnGen Teams</a> | FINBB - Finnish biobank cooperative |
| Sarah Smith                   | Finnish Biobank Cooperative - FINBB                                                                   | sarah.smith@finbb.fi          | <a href="#">FinnGen Teams</a> | FINBB - Finnish                     |

Tom Finnish Biobank Cooperative - FINBB  
Southerington

tom.southerington@finbb.fi [FinnGen](#) [Teams](#)

**biobank  
cooperative**

**FINBB -  
Finnish  
biobank  
cooperative**

Meri Finnish Biobank Cooperative - FINBB  
Lähteenmäki

meri.lahtenmaki@finbb.fi [FinnGen](#) [Teams](#)

**FINBB -  
Finnish  
biobank  
cooperative**
